# Supplementary material for: Activation of the C–I and C–OH bonds of 2-iodoethanol by gas phase silver cluster cations yields subvalent silver-iodide and -hydroxide cluster cations
Source: Royal Society of Chemistry journal article supplement (doi:10.1039/b700132k), 2007-01-01
Supplement: b700132k.pdf [file b700132k.pdf]

**Supplementary Material For Dalton Trans. Manuscript B700132K (Version: April 5, 2007)**  
**“Activation of the C-I and C-OH Bonds of 2-Iodoethanol by Gas Phase Silver Cluster Cations Yields Subvalent Silver Iodide and Hydroxide Cluster Cations” by George N. Khairallah and Richard A. J. O’Hair\*, School of Chemistry and Bio21 Institute of Molecular Science and Biotechnology, The University of Melbourne, Victoria 3010, AUSTRALIA**

\* Corresponding Author: Phone +61 3 8344-2452; FAX: +613 9347-5180, EMAIL:

rohair@unimelb.edu.au

**List of Supplementary Material:**

**Supplementary Figure S1.**

**Supplementary Figure S2.**

**Supplementary Figure S3.**

**(A) Cartesian Coordinates for structures shown in Figures 2 and 3.**

**(B) Cartesian Coordinates for structures shown in Figures 4, 5 and 6.**

**(C) Cartesian Coordinates for structures used in thermochemical calculations**

**Supplementary Table S1.**

**Supplementary Table S2.**

**Supplementary Table S3.**

**Supplementary Figure Captions:**

**Figure S1.** Ion-molecule reactions of 2-iodoethanol ( $\text{ICH}_2\text{CH}_2\text{OH}$ ) with: (a)  $\text{Ag}_2\text{H}^+$  (pressure = *ca*  $1.6 \times 10^{-7}$  Torr; reaction time = 300ms); (b)  $\text{Ag}_3^+$  (pressure = *ca*  $1.6 \times 10^{-7}$  Torr; reaction time = 300ms); (c)  $\text{Ag}_4\text{H}^+$  (pressure = *ca*  $1.6 \times 10^{-7}$  Torr; reaction time = 300ms). The “^” denotes addition of background water and “&” addition of background MeOH. The asterisk denotes the selected peak.

**Figure S2.** Ion-molecule reactions of 2-iodoethanol ( $\text{ICH}_2\text{CH}_2\text{OH}$ ) with: (a)  $\text{Ag}_5(\text{ICH}_2\text{CH}_2\text{OH})^+$  (pressure = *ca*  $1.4 \times 10^{-7}$  Torr; reaction time = 300ms); (b)  $\text{Ag}_5\text{HOI}^+$  (pressure = *ca*  $1.4 \times 10^{-7}$  Torr; reaction time = 30ms). The “^” denotes addition of background water

and “&” addition of background MeOH, the “#” denotes a noise peak. The asterisk denotes the selected peak.

**Figure S3.** CID spectra of  $\text{Ag}_5\text{HOI}^+$ . The peaks at  $m/z$  793, 965 and 1137 arise from competing ion-molecule reactions of  $\text{Ag}_5\text{HOI}^+$  with  $\text{ICH}_2\text{CH}_2\text{OH}$  (See fig. S2b): (a) short CID time (15 ms); (b) longer CID time (30 ms); (c) ion-molecule reaction of 2-iodoethanol ( $\text{ICH}_2\text{CH}_2\text{OH}$ ) with  $\text{Ag}_4\text{OH}^+$ .

**Fig. S1** Ion-molecule reactions of 2-iodoethanol ( $\text{ICH}_2\text{CH}_2\text{OH}$ ) with: (a)  $\text{Ag}_2\text{H}^+$  (pressure = *ca*  $1.6 \times 10^{-7}$  Torr; reaction time = 300ms); (b)  $\text{Ag}_3^+$  (pressure = *ca*  $1.6 \times 10^{-7}$  Torr; reaction time = 300ms); (c)  $\text{Ag}_4\text{H}$  (pressure = *ca*  $1.6 \times 10^{-7}$  Torr; reaction time = 300ms). The “^” denotes addition of background water and “&” addition of background MeOH. The asterisk denotes the selected peak.

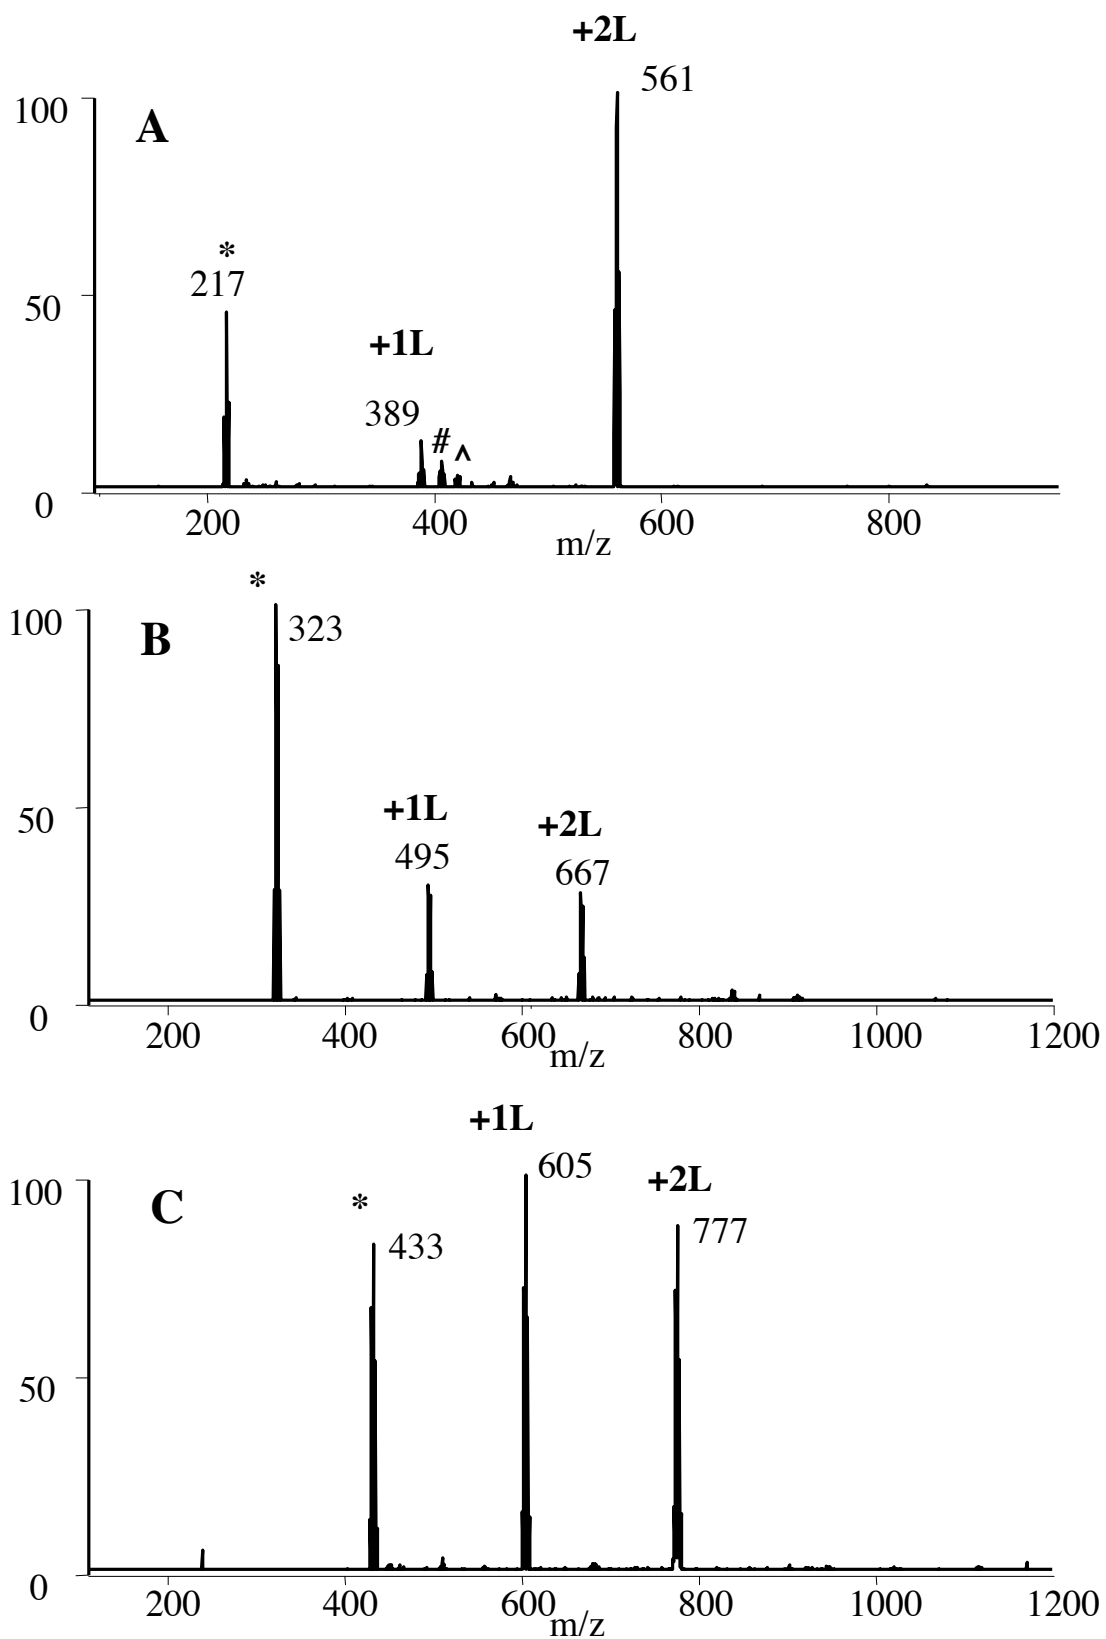

**Fig. S 2(a):** Ion-molecule reactions of 2-iodoethanol ( $\text{ICH}_2\text{CH}_2\text{OH}$ ) with:  $\text{Ag}_5(\text{ICH}_2\text{CH}_2\text{OH})^+$  (pressure = *ca*  $1.4 \times 10^{-7}$  Torr; reaction time = 300ms)

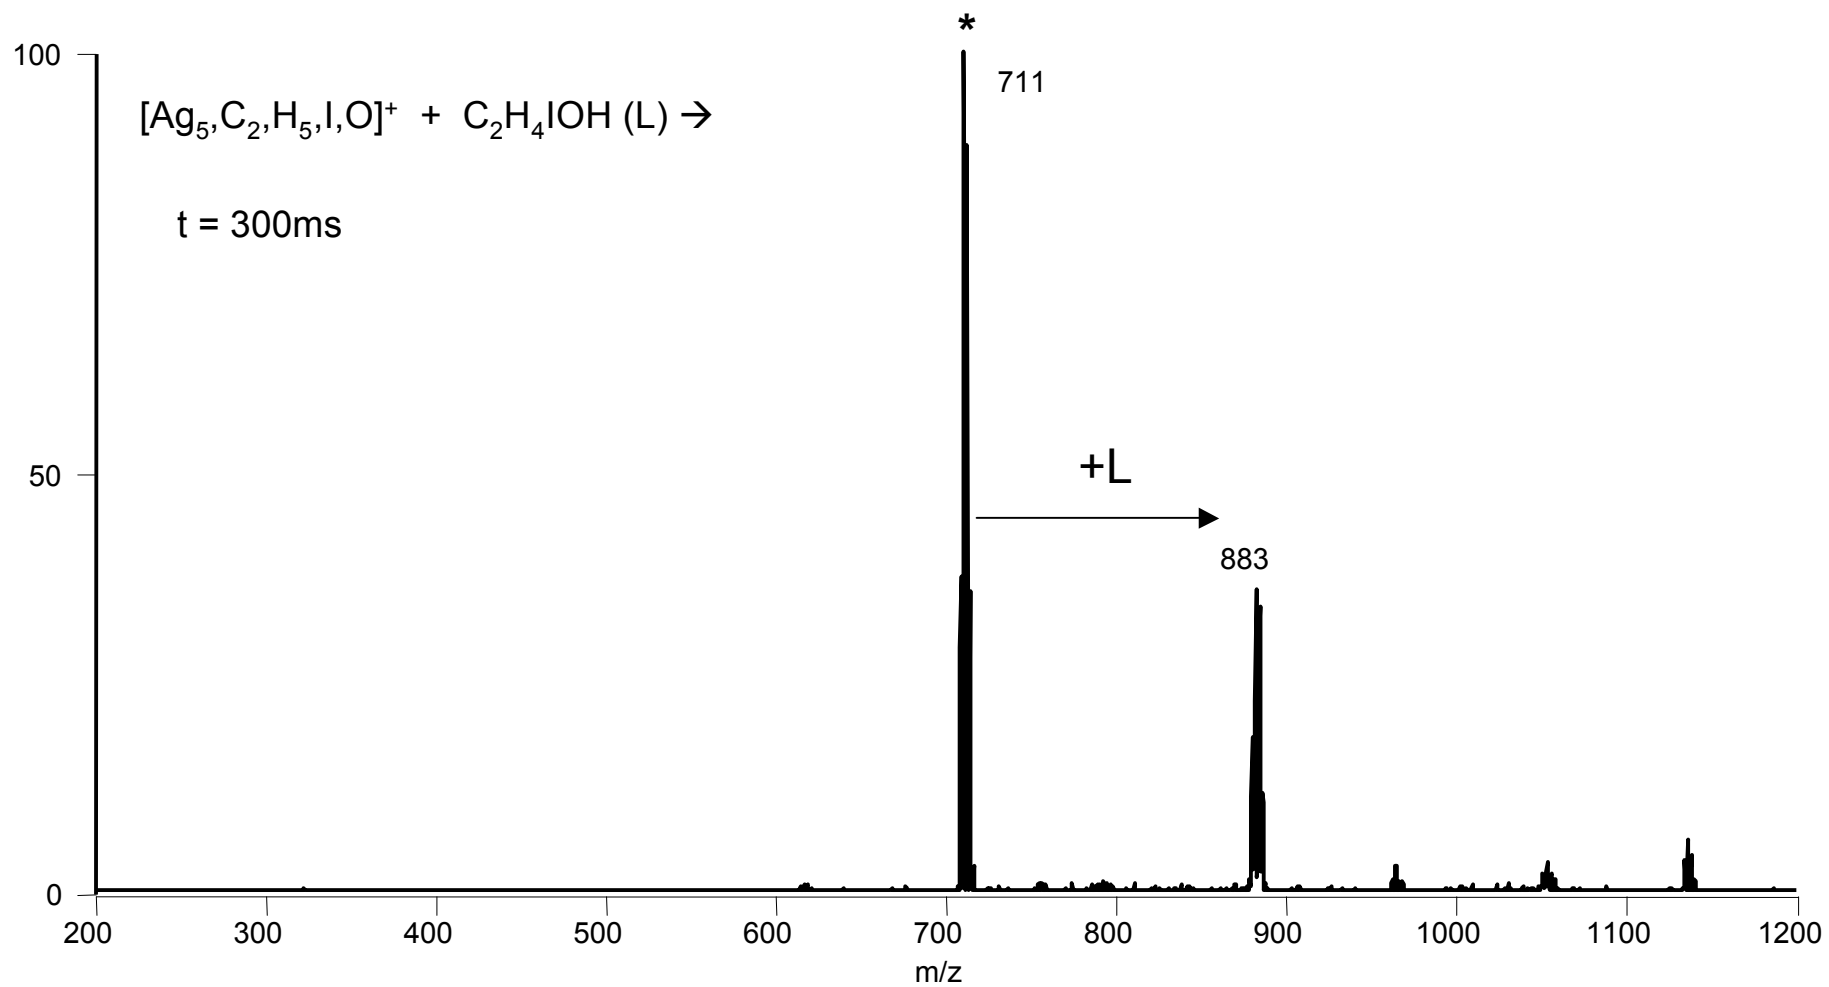

**Fig. S 2(b):** Ion-molecule reactions of 2-iodoethanol ( $\text{ICH}_2\text{CH}_2\text{OH}$ ) with  $\text{Ag}_5(\text{I},\text{O},\text{H})^+$  (pressure = *ca*  $1.4 \times 10^{-7}$  Torr; reaction time = 30ms). The “^” denotes addition of background water and “&” addition of background MeOH, the “#” denotes a noise peak. The asterisk denotes the selected peak.

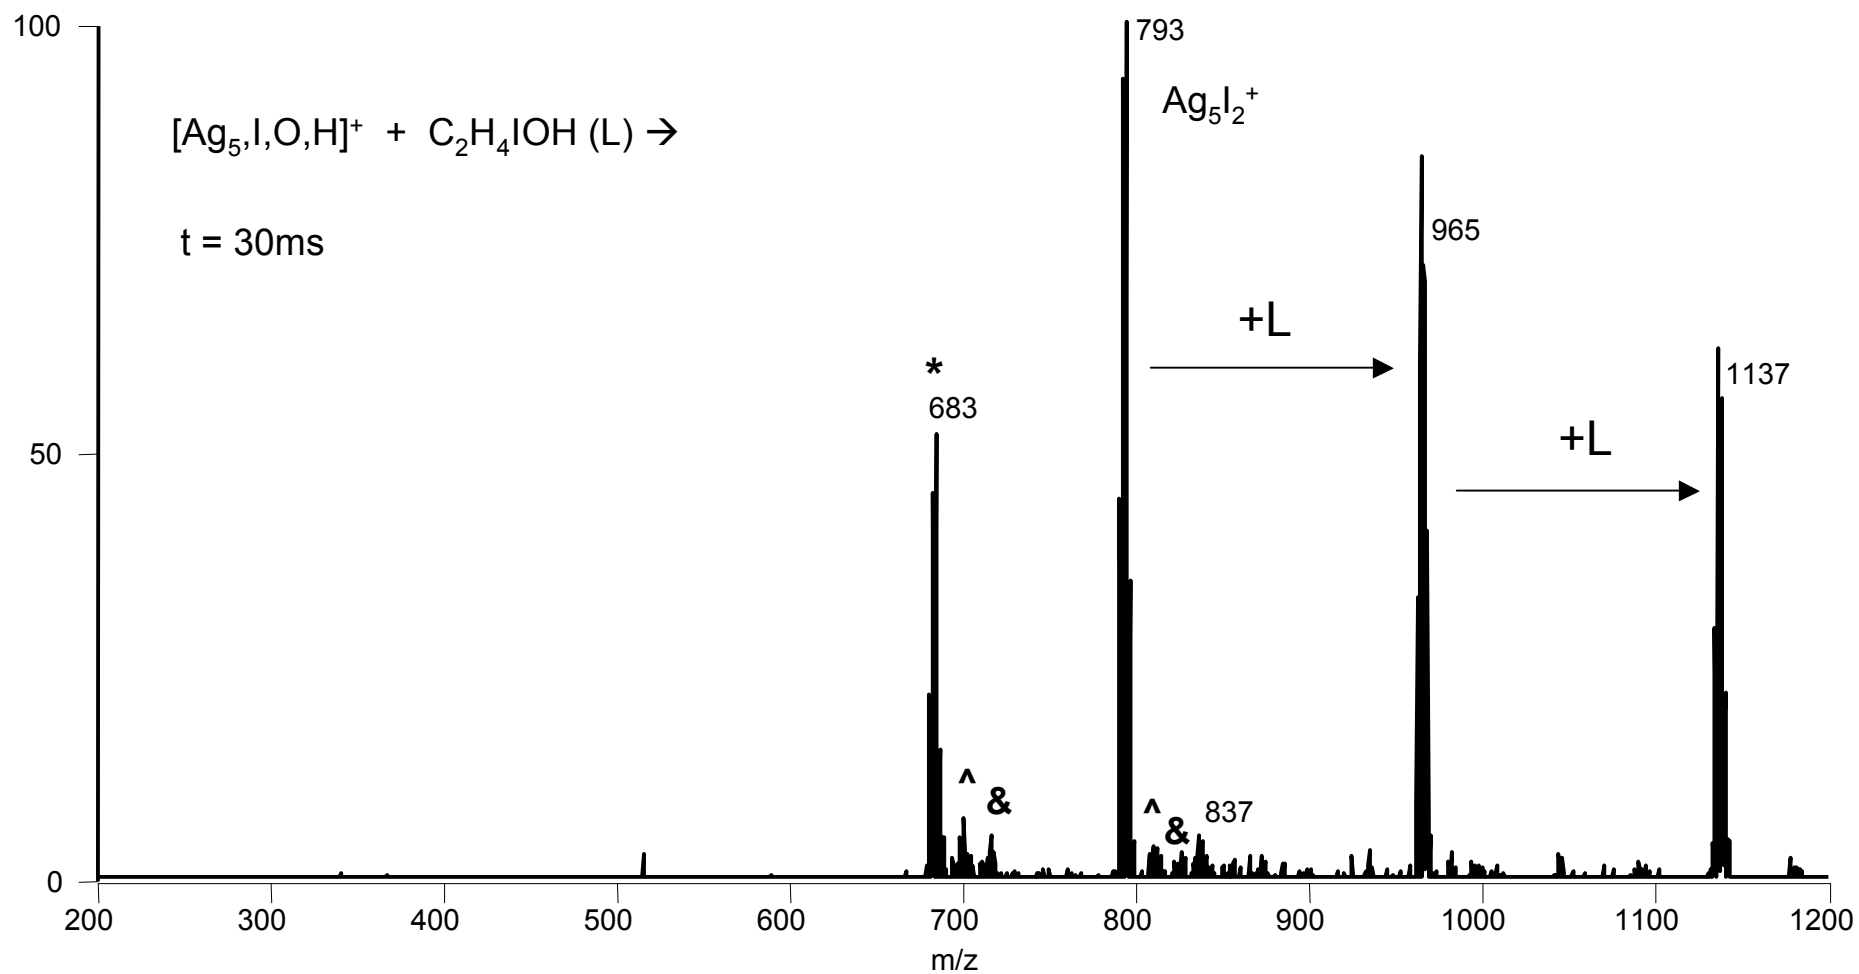

**Fig. S 3(a)**

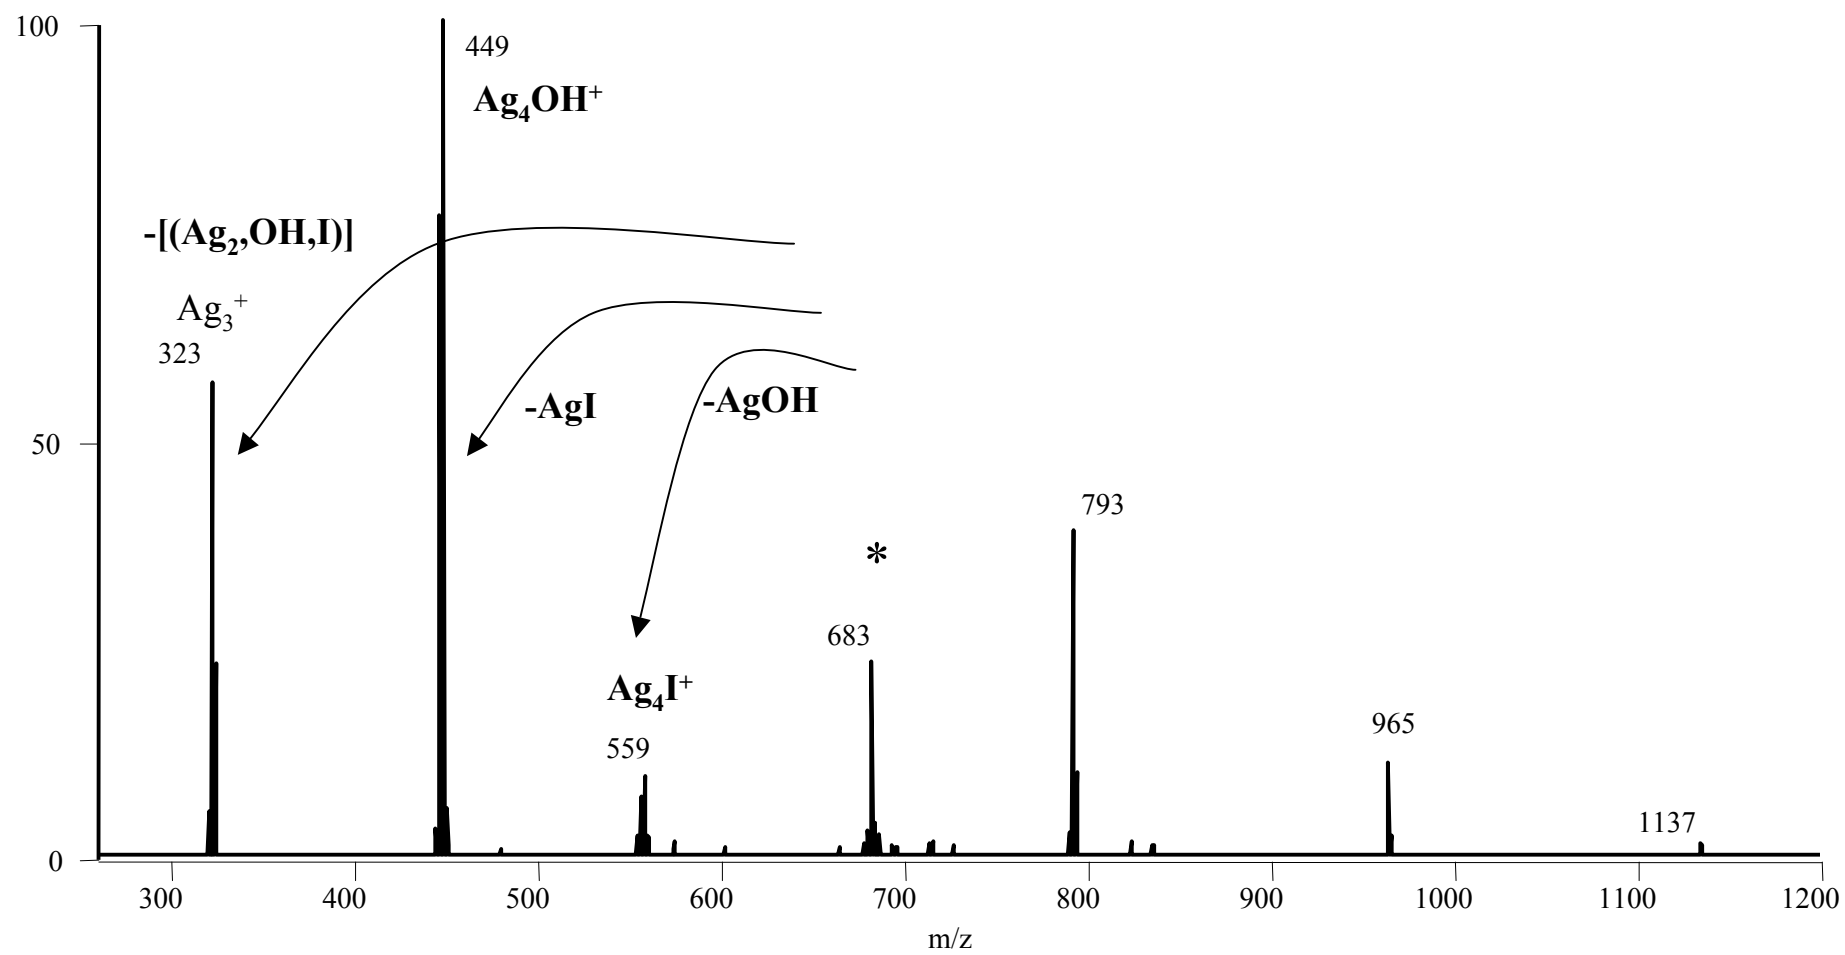

**Fig. S 3(b)**

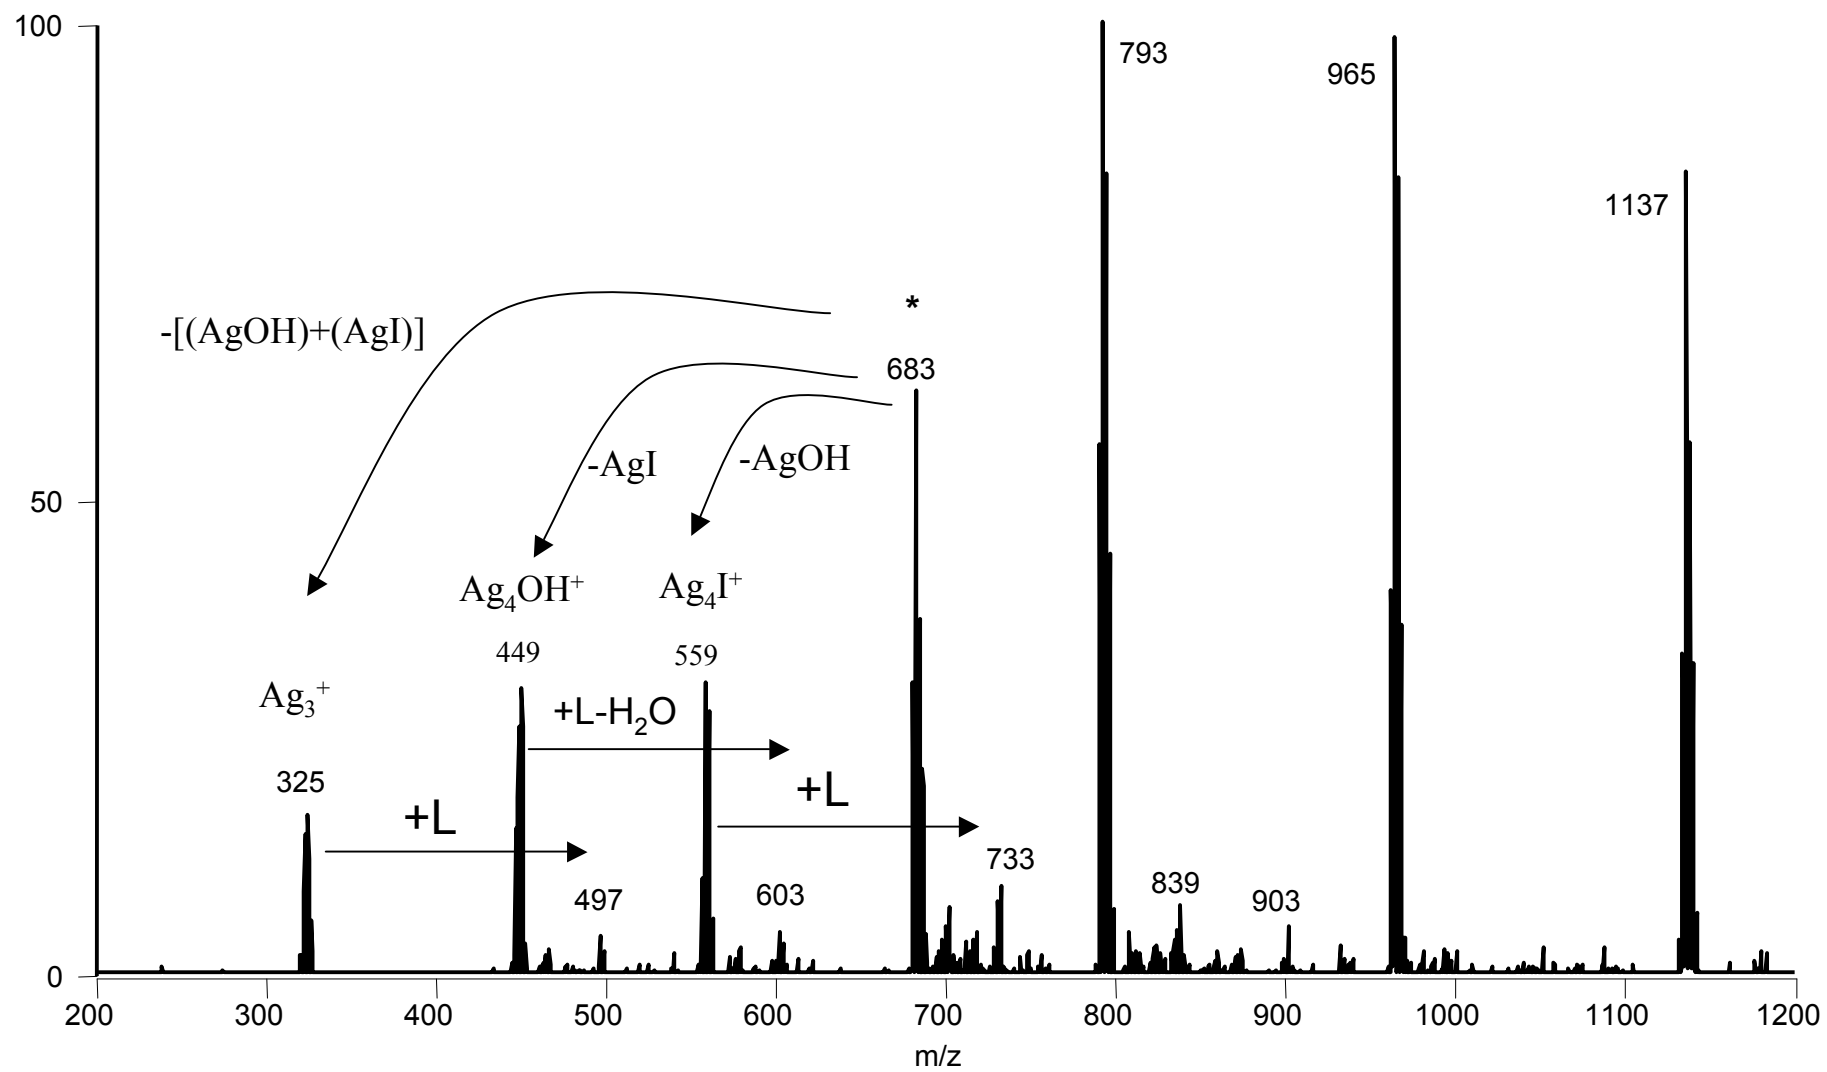

**Fig. S 3(c)**

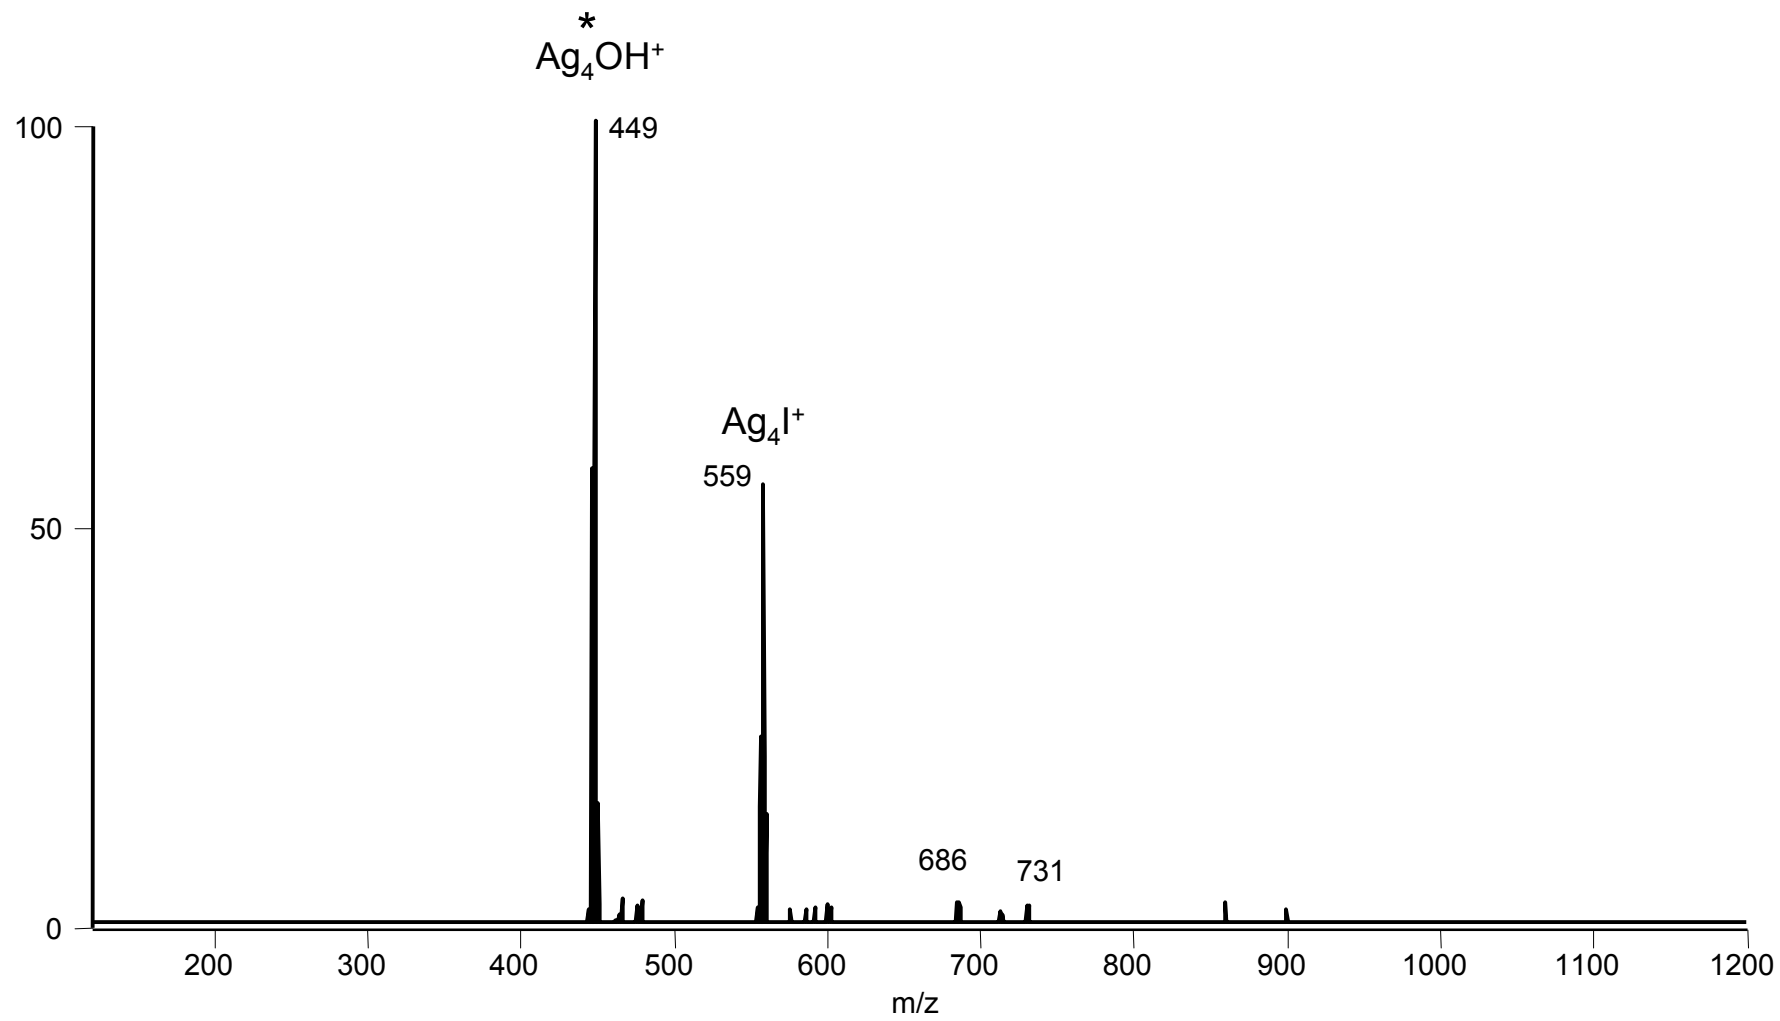



**(A) Cartesian Coordinates for structures shown in Figures 2 and 3. All calculations carried out at the B3LYP/6-31G\* level of theory with the SDD ECP for Ag and I.**

**Ag<sub>5</sub><sup>+</sup> “bow-tie” isomer (1) (Figure 2a)**

E(B3LYP) = -734.9407527 (0 imag. Freq.), ZPC = 0.001823

|    |           |           |           |
|----|-----------|-----------|-----------|
| Ag | 2.459670  | -0.943020 | -0.937226 |
| Ag | 2.458700  | 0.943446  | 0.937622  |
| Ag | 0.000001  | -0.000623 | -0.000279 |
| Ag | -2.459000 | 0.943265  | -0.937549 |
| Ag | -2.459372 | -0.943068 | 0.937432  |

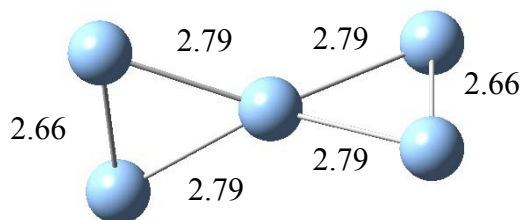

**(1)**

**Ag<sub>5</sub><sup>+</sup> “trigonal bipyramidal” isomer (2) (Figure 2b)**

E(B3LYP)=-734.9145446 (2 small imag. Freq.; -21.6 and -18.1) ZPC = 0.001731

|   |    |   |           |           |           |
|---|----|---|-----------|-----------|-----------|
| 1 | 47 | 0 | 0.000000  | 1.373613  | -0.792884 |
| 2 | 47 | 0 | 0.000000  | -1.373613 | -0.792884 |
| 3 | 47 | 0 | 0.000000  | 0.000000  | 1.586786  |
| 4 | 47 | 0 | -2.400133 | 0.000000  | -0.000509 |
| 5 | 47 | 0 | 2.400133  | 0.000000  | -0.000509 |

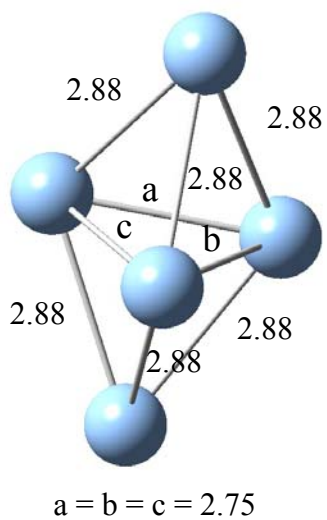

(2)

 $\text{Ag}_3^+$ 

E(B3LYP) = -440.842526, (0 imag. Freq.) ZPC = 0.000896

|    |           |           |          |
|----|-----------|-----------|----------|
| Ag | 1.365972  | -0.789317 | 0.000000 |
| Ag | 0.000000  | 1.576555  | 0.000000 |
| Ag | -1.365972 | -0.787238 | 0.000000 |

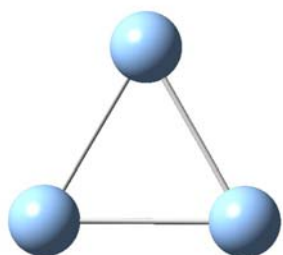

(3)

**ICH<sub>2</sub>CH<sub>2</sub>OH (Figure 2c).**

E(B3LYP) = -165.842973; (0 imag. Freq.) ZPC = 0.070610

|   |           |           |           |
|---|-----------|-----------|-----------|
| C | -1.047032 | 0.686404  | 0.000011  |
| I | 1.036615  | -0.036657 | -0.000020 |
| C | -2.023016 | -0.478178 | 0.000030  |

|   |           |           |           |
|---|-----------|-----------|-----------|
| O | -3.316744 | 0.112667  | 0.000117  |
| H | -1.146771 | 1.300299  | -0.893732 |
| H | -1.146747 | 1.300297  | 0.893759  |
| H | -1.859958 | -1.103737 | 0.889849  |
| H | -1.860048 | -1.103682 | -0.889843 |
| H | -3.972853 | -0.601048 | -0.000165 |

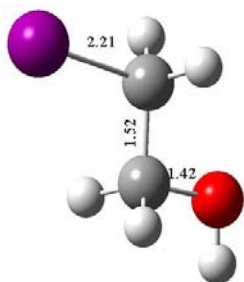

(5)

**AgI**

E(B3LYP)=-158.4732823, (0 imag. Freq.) ZPC = 0.000436

|    |          |          |           |
|----|----------|----------|-----------|
| Ag | 0.000000 | 0.000000 | -1.393829 |
| I  | 0.000000 | 0.000000 | 1.236037  |

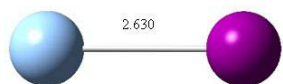

(6)

**AgOH**

E(B3LYP)=-222.7978503, (0 imag. Freq.) ZPC = 0.011498

|    |           |           |          |
|----|-----------|-----------|----------|
| Ag | 0.016722  | -0.330750 | 0.000000 |
| O  | 0.016722  | 1.698038  | 0.000000 |
| H  | -0.919732 | 1.960947  | 0.000000 |

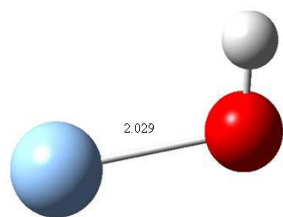

(7)

**Ag<sub>5</sub>(IC<sub>2</sub>H<sub>4</sub>OH)<sup>+</sup> complexes.**

**8a-**

E(B3LYP) = -900.8167765; (0 imag. Freq.); ZPC = 0.073161

|    |           |           |           |
|----|-----------|-----------|-----------|
| Ag | -3.256732 | 0.413872  | 2.019458  |
| Ag | -3.304767 | -1.784336 | 0.542013  |
| Ag | -1.523454 | 0.254922  | -0.179628 |
| Ag | -0.471877 | 1.709442  | -2.233724 |
| Ag | 1.254289  | 0.501434  | -0.580369 |
| I  | 3.670008  | -0.314914 | 0.642641  |
| C  | 4.895273  | -0.930590 | -1.133086 |
| C  | 5.985069  | -1.879953 | -0.700680 |
| O  | 6.796133  | -1.223858 | 0.246747  |
| H  | 4.187837  | -1.380457 | -1.827851 |
| H  | 5.285853  | 0.015849  | -1.504102 |
| H  | 6.542786  | -2.125177 | -1.623052 |
| H  | 5.554450  | -2.814323 | -0.311963 |
| H  | 7.487012  | -1.831997 | 0.551418  |

**IN:**

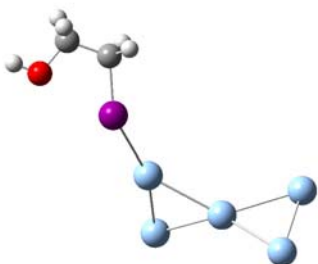

**OUT:**

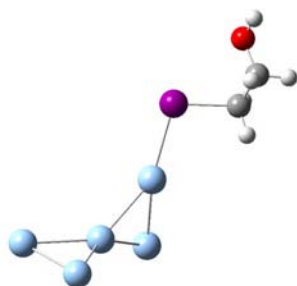

**8b-**

E(B3LYP)=-900.82169; (0 imag. Freq.); ZPC = 0.073559

|    |           |           |           |
|----|-----------|-----------|-----------|
| Ag | -3.763303 | -0.286047 | 1.376109  |
| Ag | -3.803429 | -0.465237 | -1.256147 |
| Ag | -1.364622 | 0.240667  | -0.019197 |
| Ag | 0.787665  | 1.934920  | -0.177892 |
| Ag | 1.256037  | -0.689151 | -0.034014 |
| I  | 4.106467  | -1.389047 | -0.005934 |
| C  | 5.114860  | 0.585415  | 0.238968  |
| C  | 4.233727  | 1.726674  | 0.711746  |
| O  | 3.278788  | 2.178079  | -0.251331 |
| H  | 5.891758  | 0.365131  | 0.972030  |
| H  | 5.565096  | 0.766840  | -0.737753 |
| H  | 4.905171  | 2.553051  | 0.990366  |
| H  | 3.662129  | 1.450543  | 1.600101  |
| H  | 3.730900  | 2.634610  | -0.980217 |

**IN:**

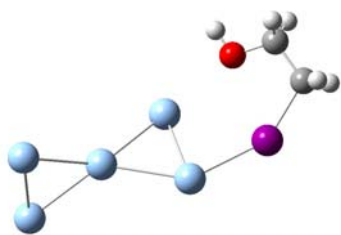

**OUT:**

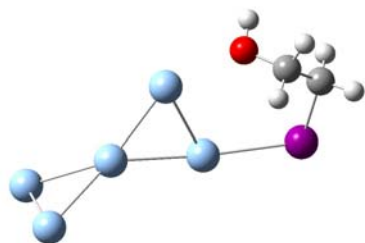

**8c-(unconverged)**

|    |             |             |             |
|----|-------------|-------------|-------------|
| Ag | 3.43232989  | -1.59188700 | -1.29580796 |
| Ag | 3.64298701  | -1.31798005 | 1.33183706  |
| Ag | 1.81712306  | 0.31336001  | -0.02818600 |
| Ag | 0.93053102  | 2.89176202  | -0.29030901 |
| Ag | -0.89648300 | 1.00077200  | 0.12927300  |
| O  | -2.94299507 | 0.03616800  | 0.39069301  |
| C  | -3.97697306 | 0.44088799  | 1.31920695  |
| C  | -5.01222992 | -0.64509499 | 1.52204597  |
| I  | -6.04576921 | -1.12885404 | -0.37458700 |
| H  | -3.46169209 | 0.61605000  | 2.26811910  |
| H  | -4.43098783 | 1.38056898  | 0.98585403  |
| H  | -5.79523993 | -0.31844300 | 2.20611596  |
| H  | -4.57397604 | -1.58360302 | 1.85894704  |
| H  | -3.37806106 | -0.24269301 | -0.43891799 |

**IN:**

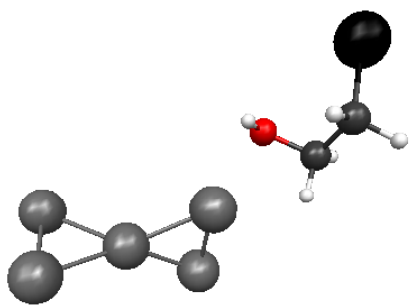

**OUT: (Unconverged)**

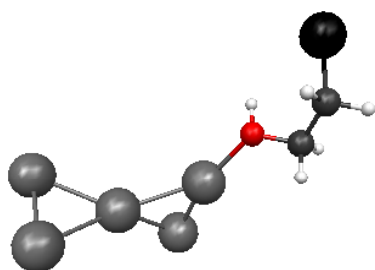

**8d-**

E(B3LYP)=-900.814274 (1 small imag. Freq. -7.29); ZPC = 0.073292

|    |    |   |           |           |           |
|----|----|---|-----------|-----------|-----------|
| 1  | 47 | 0 | -3.586054 | -0.945575 | -1.050223 |
| 2  | 47 | 0 | 1.393036  | 0.315112  | -0.347427 |
| 3  | 47 | 0 | -1.395765 | 0.456268  | -0.007023 |
| 4  | 47 | 0 | -3.387049 | -0.712219 | 1.580735  |
| 5  | 47 | 0 | 0.150470  | 2.686679  | -0.318788 |
| 6  | 1  | 0 | 6.950337  | 0.327902  | 2.139946  |
| 7  | 8  | 0 | 6.076035  | 0.747450  | 2.107322  |
| 8  | 6  | 0 | 5.413476  | 0.359192  | 0.921777  |
| 9  | 6  | 0 | 4.746352  | -0.987732 | 1.183528  |
| 10 | 1  | 0 | 4.660277  | 1.126403  | 0.717108  |
| 11 | 1  | 0 | 6.087258  | 0.303241  | 0.056621  |
| 12 | 53 | 0 | 3.471869  | -1.618940 | -0.547384 |
| 13 | 1  | 0 | 5.450562  | -1.814944 | 1.280903  |
| 14 | 1  | 0 | 4.067342  | -0.959611 | 2.034436  |

**IN:**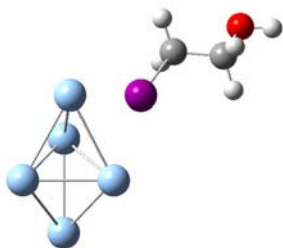**OUT:**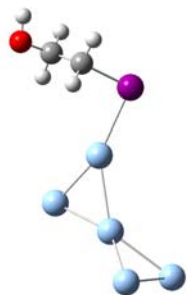



**8e-**

E(B3LYP) = -900.8141639; (0 imag. Freq.); ZPC = 0.073324

|    |    |   |           |           |           |
|----|----|---|-----------|-----------|-----------|
| 1  | 47 | 0 | -1.392228 | 0.438730  | 0.031620  |
| 2  | 47 | 0 | -3.641177 | -0.811628 | -1.076363 |
| 3  | 47 | 0 | 0.103838  | 2.718430  | -0.129259 |
| 4  | 47 | 0 | 1.390717  | 0.385981  | -0.386651 |
| 5  | 47 | 0 | -3.278638 | -0.979170 | 1.543616  |
| 6  | 1  | 0 | 6.631516  | -0.251994 | 2.696322  |
| 7  | 8  | 0 | 5.803630  | 0.245916  | 2.605093  |
| 8  | 6  | 0 | 4.852703  | -0.545776 | 1.923690  |
| 9  | 6  | 0 | 5.121609  | -0.411705 | 0.428083  |
| 10 | 1  | 0 | 4.875229  | -1.598917 | 2.234105  |
| 11 | 1  | 0 | 3.868507  | -0.138062 | 2.173782  |
| 12 | 53 | 0 | 3.540256  | -1.439853 | -0.781958 |
| 13 | 1  | 0 | 5.100994  | 0.623338  | 0.090333  |
| 14 | 1  | 0 | 6.037185  | -0.904741 | 0.098665  |

**IN:**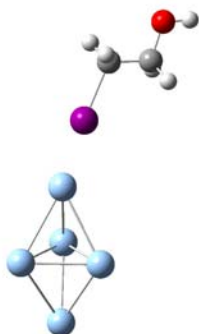**OUT:**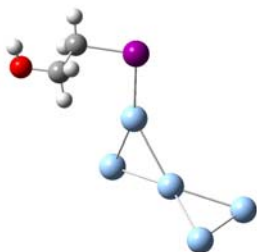**8f-**

E(B3LYP) = -900.8174116; (0 imag. Freq.); ZPC = 0.073868

|    |    |   |           |           |           |
|----|----|---|-----------|-----------|-----------|
| 1  | 47 | 0 | -3.011472 | -2.015761 | -0.995244 |
| 2  | 47 | 0 | 0.848583  | 1.117767  | 0.665345  |
| 3  | 47 | 0 | -1.720716 | 0.310551  | -0.113812 |
| 4  | 47 | 0 | -4.020159 | -0.737125 | 1.096859  |
| 5  | 47 | 0 | -0.578765 | 2.641606  | -0.990387 |
| 6  | 1  | 0 | 2.635776  | 0.955828  | 2.861787  |
| 7  | 8  | 0 | 2.607233  | 0.514462  | 1.996306  |
| 8  | 6  | 0 | 3.971935  | 0.216759  | 1.567950  |
| 9  | 6  | 0 | 3.879649  | -0.689284 | 0.358782  |
| 10 | 1  | 0 | 4.489872  | 1.150611  | 1.328817  |
| 11 | 1  | 0 | 4.485797  | -0.284664 | 2.392758  |
| 12 | 53 | 0 | 5.892897  | -1.191761 | -0.346675 |
| 13 | 1  | 0 | 3.392556  | -1.635111 | 0.594169  |
| 14 | 1  | 0 | 3.383914  | -0.204628 | -0.484386 |

IN:

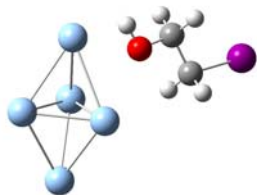

OUT:

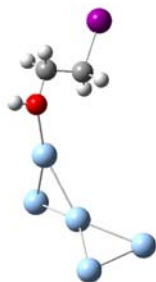**8g-**

E(B3LYP) = -900.8174116; (0 imag. Freq.); ZPC = 0.073868

|   |    |   |          |          |           |
|---|----|---|----------|----------|-----------|
| 1 | 47 | 0 | 1.720673 | 0.310631 | -0.113746 |
|---|----|---|----------|----------|-----------|

|    |    |   |           |           |           |
|----|----|---|-----------|-----------|-----------|
| 2  | 47 | 0 | 0.578947  | 2.641687  | -0.990586 |
| 3  | 47 | 0 | 3.010622  | -2.016244 | -0.994846 |
| 4  | 47 | 0 | -0.848548 | 1.118158  | 0.665343  |
| 5  | 47 | 0 | 4.020257  | -0.737247 | 1.096527  |
| 6  | 1  | 0 | -2.636067 | 0.957166  | 2.861634  |
| 7  | 8  | 0 | -2.607376 | 0.515437  | 1.996342  |
| 8  | 6  | 0 | -3.971950 | 0.216958  | 1.568147  |
| 9  | 6  | 0 | -3.879322 | -0.688463 | 0.358540  |
| 10 | 1  | 0 | -4.485276 | -0.285201 | 2.392843  |
| 11 | 1  | 0 | -4.490592 | 1.150553  | 1.329544  |
| 12 | 53 | 0 | -5.892405 | -1.192041 | -0.346608 |
| 13 | 1  | 0 | -3.384164 | -0.203056 | -0.484536 |
| 14 | 1  | 0 | -3.391503 | -1.634055 | 0.593361  |

IN :

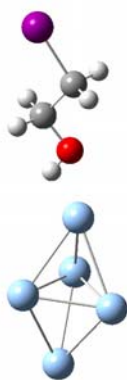

OUT:

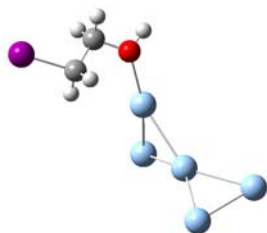

9a-

E(B3LYP)=-900.826584; (0 imag. Freq.); ZPC = 0.073927

|    |           |           |           |
|----|-----------|-----------|-----------|
| Ag | -2.254808 | -3.007613 | 0.921186  |
| Ag | -2.112672 | -2.888770 | -1.717089 |
| Ag | -1.147154 | -0.698249 | -0.239333 |
| Ag | -1.352151 | 2.022026  | -0.234177 |
| Ag | 1.076981  | 0.972994  | 0.174092  |
| I  | 3.211356  | 3.034526  | 0.655932  |
| C  | 4.595870  | 1.398991  | 1.222460  |
| C  | 4.437519  | 0.183731  | 0.342591  |
| O  | 3.110050  | -0.352248 | 0.490021  |
| H  | 5.589732  | 1.833890  | 1.121014  |
| H  | 4.370562  | 1.190810  | 2.267816  |
| H  | 5.166051  | -0.562792 | 0.688888  |
| H  | 4.645186  | 0.420198  | -0.707487 |
| H  | 3.066670  | -1.208573 | 0.035034  |

IN:

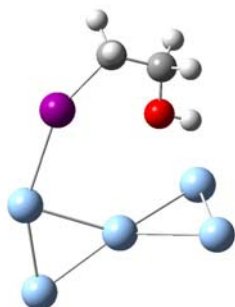

OUT:

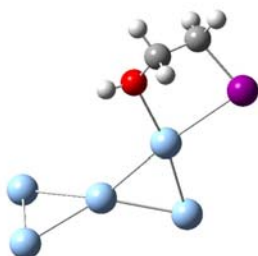**9a'**-

E(B3LYP) = -900.8265806 (0 imag. Freq) ZPC = 0.073931

|   |    |   |           |           |           |
|---|----|---|-----------|-----------|-----------|
| 1 | 47 | 0 | 1.331222  | 0.304049  | -0.018883 |
| 2 | 47 | 0 | -0.407226 | 2.405091  | 0.044626  |
| 3 | 47 | 0 | -1.458157 | -0.055260 | -0.064762 |
| 4 | 47 | 0 | 3.532940  | -0.784218 | 1.348493  |

|    |    |   |           |           |           |
|----|----|---|-----------|-----------|-----------|
| 5  | 47 | 0 | 3.753105  | -0.409391 | -1.259956 |
| 6  | 6  | 0 | -3.351840 | -2.876776 | -0.692822 |
| 7  | 8  | 0 | -2.046961 | -2.419600 | -0.293411 |
| 8  | 6  | 0 | -4.398683 | -2.282214 | 0.215763  |
| 9  | 53 | 0 | -4.462736 | -0.069931 | 0.090343  |
| 10 | 1  | 0 | -3.401603 | -3.968166 | -0.572632 |
| 11 | 1  | 0 | -3.545178 | -2.627747 | -1.742719 |
| 12 | 1  | 0 | -4.211343 | -2.497891 | 1.267097  |
| 13 | 1  | 0 | -5.399844 | -2.602074 | -0.071419 |
| 14 | 1  | 0 | -1.376781 | -2.919836 | -0.786258 |

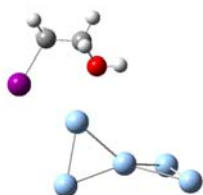**9b-**

E(B3LYP)=-900.8283383 (0 imag. Freq) ZPC = 0.073870

|    |    |   |           |           |           |
|----|----|---|-----------|-----------|-----------|
| 1  | 47 | 0 | 1.124928  | 0.527687  | -0.029132 |
| 2  | 47 | 0 | -0.191976 | 2.922761  | -0.114912 |
| 3  | 47 | 0 | -1.666321 | 0.687211  | 0.001706  |
| 4  | 47 | 0 | 3.248117  | -0.710057 | 1.328114  |
| 5  | 47 | 0 | 3.064861  | -1.059091 | -1.290318 |
| 6  | 6  | 0 | -4.764620 | -1.286636 | -0.348447 |
| 7  | 53 | 0 | -2.731928 | -2.080771 | 0.075856  |
| 8  | 6  | 0 | -5.046969 | -0.011542 | 0.406313  |
| 9  | 8  | 0 | -4.113830 | 1.000885  | 0.001170  |
| 10 | 1  | 0 | -5.435869 | -2.089744 | -0.045896 |
| 11 | 1  | 0 | -4.783822 | -1.149265 | -1.429035 |
| 12 | 1  | 0 | -5.005839 | -0.170581 | 1.490356  |
| 13 | 1  | 0 | -6.065370 | 0.300839  | 0.133787  |
| 14 | 1  | 0 | -4.378340 | 1.851535  | 0.387311  |

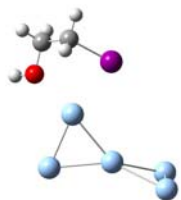

**9b'.**-

E(B3LYP) = -900.8283462 (0 imag. Freq.) ZPC = 0.073875

|    |    |   |           |           |           |
|----|----|---|-----------|-----------|-----------|
| 1  | 47 | 0 | -1.103129 | 0.563675  | 0.019196  |
| 2  | 47 | 0 | -3.205653 | -0.754304 | -1.300698 |
| 3  | 47 | 0 | 0.213187  | 2.964133  | 0.055796  |
| 4  | 47 | 0 | 1.685552  | 0.725988  | -0.002305 |
| 5  | 47 | 0 | -3.009692 | -1.029009 | 1.324414  |
| 6  | 6  | 0 | 4.638310  | -1.435974 | 0.456197  |
| 7  | 6  | 0 | 5.043278  | -0.161997 | -0.242617 |
| 8  | 53 | 0 | 2.604325  | -2.105637 | -0.134032 |
| 9  | 8  | 0 | 4.141493  | 0.891955  | 0.125960  |
| 10 | 1  | 0 | 4.480115  | 1.735996  | -0.213952 |
| 11 | 1  | 0 | 4.585635  | -1.323473 | 1.538555  |
| 12 | 1  | 0 | 5.287012  | -2.267633 | 0.183155  |
| 13 | 1  | 0 | 5.068192  | -0.292505 | -1.330903 |
| 14 | 1  | 0 | 6.055906  | 0.085849  | 0.106788  |

**IN**

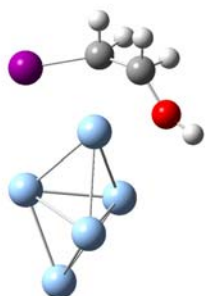

**OUT**

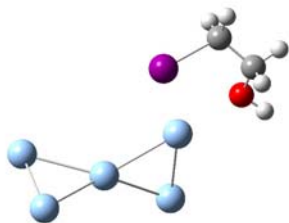

**9c-**

E(B3LYP)=-900.8335442 ( 0 imag. Freq) ZPC = 0.074137

|    |           |           |           |
|----|-----------|-----------|-----------|
| Ag | 0.834485  | -1.980878 | -0.277431 |
| Ag | 1.499759  | 0.706395  | 0.023872  |
| Ag | -1.220031 | 1.327253  | -0.036495 |
| Ag | 3.359362  | -1.336645 | 0.223996  |
| Ag | 0.581407  | 3.299358  | -0.052064 |
| C  | -2.630339 | -2.194452 | 1.061835  |
| C  | -2.307243 | -3.319869 | 0.109550  |
| I  | -3.518452 | -0.425766 | 0.050723  |
| O  | -1.242037 | -2.931059 | -0.778240 |
| H  | -1.222380 | -3.530135 | -1.542525 |
| H  | -1.753602 | -1.812033 | 1.585192  |
| H  | -3.391811 | -2.496431 | 1.781136  |
| H  | -3.184273 | -3.607280 | -0.478422 |
| H  | -1.992323 | -4.181877 | 0.715671  |

**IN:**

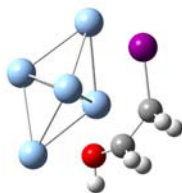

**OUT:**

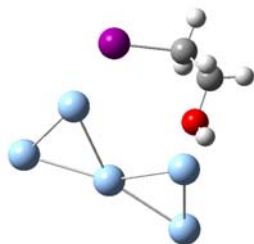**9d-**

E(B3LYP) = -900.8244831 (0 imag. Freq) ZPC = 0.073772

|    |    |   |           |           |           |
|----|----|---|-----------|-----------|-----------|
| 1  | 47 | 0 | -0.256136 | -0.243739 | 0.077304  |
| 2  | 47 | 0 | 1.706768  | 1.759256  | -0.265610 |
| 3  | 47 | 0 | -0.760271 | 2.496600  | 0.410078  |
| 4  | 47 | 0 | -2.326098 | -2.153843 | -0.035071 |
| 5  | 47 | 0 | -2.867027 | 0.470332  | -0.247020 |
| 6  | 6  | 0 | 3.769642  | -0.865192 | 0.867279  |
| 7  | 53 | 0 | 2.050373  | -2.052947 | 0.090854  |
| 8  | 6  | 0 | 4.578575  | -0.186452 | -0.209802 |
| 9  | 8  | 0 | 3.809578  | 0.855698  | -0.832219 |
| 10 | 1  | 0 | 4.368627  | -1.606806 | 1.396211  |
| 11 | 1  | 0 | 3.325295  | -0.165700 | 1.575667  |
| 12 | 1  | 0 | 4.916746  | -0.902773 | -0.966106 |
| 13 | 1  | 0 | 5.461590  | 0.248353  | 0.282045  |
| 14 | 1  | 0 | 4.321945  | 1.252936  | -1.555180 |

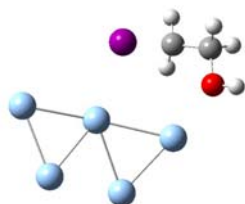**9e-**

E(B3LYP) = -900.8325944 (0 imag. Freq.) ZPC = 0.074046

|   |    |   |          |           |           |
|---|----|---|----------|-----------|-----------|
| 1 | 47 | 0 | 1.464164 | 0.745798  | -0.018696 |
| 2 | 47 | 0 | 1.029346 | -1.998801 | 0.160321  |



|    |    |   |           |           |           |
|----|----|---|-----------|-----------|-----------|
| 3  | 47 | 0 | 0.362215  | 3.246172  | 0.337565  |
| 4  | 47 | 0 | -1.291594 | 1.194136  | -0.082630 |
| 5  | 47 | 0 | 3.481027  | -1.125172 | -0.358777 |
| 6  | 53 | 0 | -3.455943 | -0.653419 | -0.597127 |
| 7  | 6  | 0 | -3.394428 | -2.082631 | 1.100996  |
| 8  | 6  | 0 | -2.007909 | -2.327273 | 1.662302  |
| 9  | 1  | 0 | -4.051355 | -1.646624 | 1.854621  |
| 10 | 1  | 0 | -3.854527 | -2.979718 | 0.683507  |
| 11 | 8  | 0 | -1.083089 | -2.874601 | 0.712839  |
| 12 | 1  | 0 | -2.112574 | -3.006861 | 2.520339  |
| 13 | 1  | 0 | -1.554189 | -1.401248 | 2.020935  |
| 14 | 1  | 0 | -1.306032 | -3.798346 | 0.510076  |

IN:

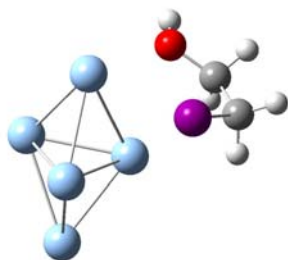

OUT:

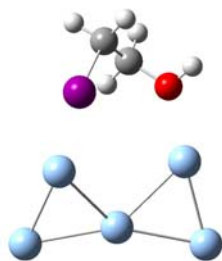

9f-

E(B3LYP) = -900.8314317 ( 0 imag. Freq.) ZPC = 0.074026

|   |    |   |           |           |           |
|---|----|---|-----------|-----------|-----------|
| 1 | 47 | 0 | 2.111446  | -2.632092 | -0.490301 |
| 2 | 47 | 0 | 1.852942  | 0.072113  | -0.005467 |
| 3 | 47 | 0 | -0.450078 | 1.617740  | -0.111069 |
| 4 | 47 | 0 | -0.245758 | -1.706712 | 0.370932  |
| 5 | 47 | 0 | 1.888703  | 2.812657  | 0.381147  |
| 6 | 6  | 0 | -3.876890 | -0.217812 | 1.123999  |

|    |    |   |           |           |           |
|----|----|---|-----------|-----------|-----------|
| 7  | 6  | 0 | -3.618975 | -1.678531 | 1.399068  |
| 8  | 53 | 0 | -3.037002 | 0.479477  | -0.818318 |
| 9  | 8  | 0 | -2.223092 | -1.899345 | 1.679127  |
| 10 | 1  | 0 | -2.135039 | -2.702535 | 2.217838  |
| 11 | 1  | 0 | -3.437900 | 0.437534  | 1.875261  |
| 12 | 1  | 0 | -4.942689 | -0.019085 | 1.013397  |
| 13 | 1  | 0 | -3.950740 | -2.316570 | 0.572688  |
| 14 | 1  | 0 | -4.203587 | -1.932995 | 2.293868  |

IN:

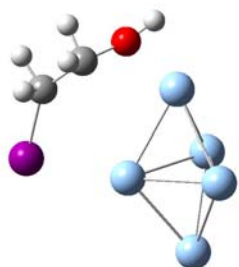

OUT :

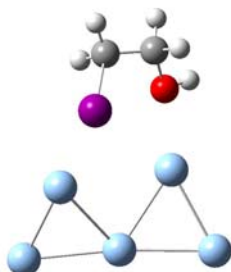

9g-

E(B3LYP)= -900.8325564 (0 imag. Freq.) ZPC = 0.074084

|    |    |   |           |           |           |
|----|----|---|-----------|-----------|-----------|
| 1  | 47 | 0 | 1.308468  | 1.203486  | -0.084043 |
| 2  | 47 | 0 | -1.445223 | 0.744035  | -0.013751 |
| 3  | 47 | 0 | -1.058876 | -2.007100 | 0.230637  |
| 4  | 47 | 0 | -0.350024 | 3.246211  | 0.355150  |
| 5  | 47 | 0 | -3.468136 | -1.102639 | -0.419899 |
| 6  | 6  | 0 | 3.391974  | -2.071793 | 1.094482  |
| 7  | 6  | 0 | 2.014572  | -2.296862 | 1.685906  |
| 8  | 53 | 0 | 3.429319  | -0.681702 | -0.635827 |
| 9  | 8  | 0 | 1.069740  | -2.861894 | 0.766721  |
| 10 | 1  | 0 | 1.288766  | -3.789567 | 0.577939  |

|    |   |   |          |           |          |
|----|---|---|----------|-----------|----------|
| 11 | 1 | 0 | 3.840280 | -2.980508 | 0.689420 |
| 12 | 1 | 0 | 4.064403 | -1.622466 | 1.826308 |
| 13 | 1 | 0 | 1.571241 | -1.360818 | 2.031366 |
| 14 | 1 | 0 | 2.132378 | -2.957073 | 2.557310 |

IN:

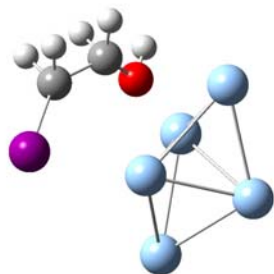

OUT:

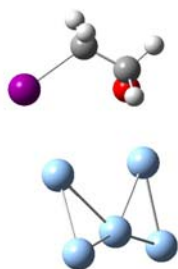

**9h-**

E(B3LYP)=-900.8303377; (0 imag. Freq.); ZPC= 0.074298

|    |    |   |           |           |           |
|----|----|---|-----------|-----------|-----------|
| 1  | 47 | 0 | 1.125057  | 0.741150  | -0.001763 |
| 2  | 47 | 0 | -1.672590 | 1.136961  | -0.003984 |
| 3  | 47 | 0 | 3.656939  | -0.350464 | -0.310458 |
| 4  | 47 | 0 | 1.664105  | -2.016396 | 0.189538  |
| 5  | 47 | 0 | -0.043675 | 3.230708  | 0.196368  |
| 6  | 1  | 0 | -0.186703 | -4.381225 | 0.270252  |
| 7  | 8  | 0 | -0.123581 | -3.479375 | 0.627600  |
| 8  | 6  | 0 | -1.431012 | -2.909698 | 0.836761  |
| 9  | 6  | 0 | -2.043929 | -2.507136 | -0.500760 |
| 10 | 1  | 0 | -2.066633 | -3.617678 | 1.377686  |
| 11 | 1  | 0 | -1.258973 | -2.042975 | 1.476801  |
| 12 | 53 | 0 | -3.643493 | -1.002884 | -0.212410 |
| 13 | 1  | 0 | -1.318715 | -2.014024 | -1.147663 |
| 14 | 1  | 0 | -2.527855 | -3.327356 | -1.032099 |

**IN :**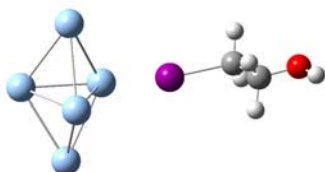**OUT:**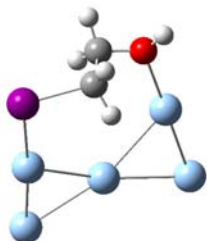

**10a-**

E(B3LYP)=-900.7972188 (0 imag. Freq.) ZPC = 0.073845

|    |    |   |           |           |           |
|----|----|---|-----------|-----------|-----------|
| 1  | 47 | 0 | -0.115497 | -0.642205 | -0.115020 |
| 2  | 47 | 0 | -2.312880 | 0.542472  | -1.297080 |
| 3  | 47 | 0 | -2.069038 | 0.566504  | 1.414862  |
| 4  | 47 | 0 | -0.304400 | 2.223112  | -0.098737 |
| 5  | 47 | 0 | -2.859168 | -1.834823 | 0.114099  |
| 6  | 1  | 0 | 1.450129  | -2.924681 | -0.624671 |
| 7  | 8  | 0 | 1.645626  | -2.039499 | -0.276189 |
| 8  | 6  | 0 | 3.046373  | -1.705532 | -0.548683 |
| 9  | 6  | 0 | 3.458362  | -0.628800 | 0.431308  |
| 10 | 1  | 0 | 3.640713  | -2.611870 | -0.406786 |
| 11 | 1  | 0 | 3.137702  | -1.366961 | -1.584897 |
| 12 | 53 | 0 | 5.535085  | -0.042742 | 0.054743  |
| 13 | 1  | 0 | 2.867105  | 0.281023  | 0.314161  |
| 14 | 1  | 0 | 3.417608  | -0.977988 | 1.462791  |

**Start:**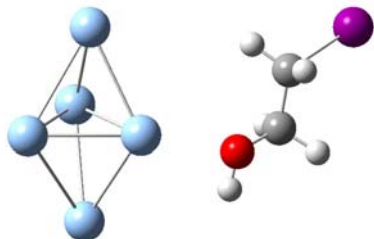**END:**

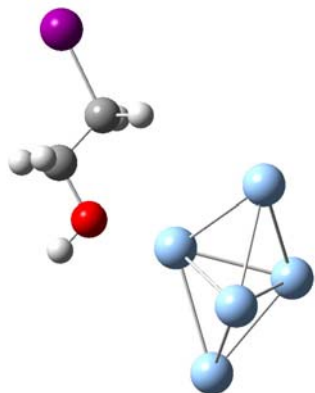**11a-**

E(B3LYP) = -900.8177201 (0 imag Freq) ZPC = 0.074003

|    |    |   |           |           |           |
|----|----|---|-----------|-----------|-----------|
| 1  | 47 | 0 | -1.322347 | -0.319689 | -1.284171 |
| 2  | 47 | 0 | 1.087499  | 0.705834  | 0.036130  |
| 3  | 47 | 0 | -1.645616 | 0.342388  | 1.265992  |
| 4  | 47 | 0 | -2.830504 | -1.971970 | 0.348704  |
| 5  | 47 | 0 | -0.807616 | 2.497290  | -0.548626 |
| 6  | 53 | 0 | 3.200180  | -1.196407 | -0.678331 |
| 7  | 6  | 0 | 4.031694  | -0.981943 | 1.374337  |
| 8  | 6  | 0 | 4.015908  | 0.447729  | 1.855559  |
| 9  | 1  | 0 | 3.418693  | -1.641326 | 1.987855  |
| 10 | 1  | 0 | 5.048349  | -1.364224 | 1.289918  |
| 11 | 8  | 0 | 2.659888  | 0.916586  | 1.934171  |
| 12 | 1  | 0 | 4.615664  | 1.094957  | 1.205274  |
| 13 | 1  | 0 | 4.459661  | 0.448211  | 2.861523  |
| 14 | 1  | 0 | 2.656806  | 1.813444  | 2.306842  |

IN:

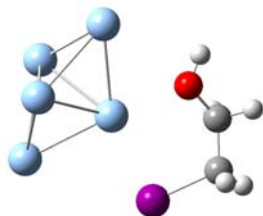

OUT:

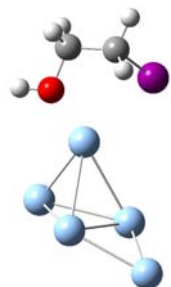**11b-**

E(B3LYP) = -900.8161269 (0 imag. Freq.) ZPC = 0.073934

|    |    |   |           |           |           |
|----|----|---|-----------|-----------|-----------|
| 1  | 47 | 0 | -1.509987 | 0.178204  | 1.343740  |
| 2  | 47 | 0 | -1.603526 | 0.140549  | -1.309231 |
| 3  | 47 | 0 | 1.088791  | 0.424226  | -0.090421 |
| 4  | 47 | 0 | -3.063528 | -1.747143 | 0.112043  |
| 5  | 47 | 0 | -0.523645 | 2.562960  | -0.075006 |
| 6  | 6  | 0 | 3.514953  | -2.271542 | -0.591194 |
| 7  | 6  | 0 | 2.234813  | -2.854848 | -0.044340 |
| 8  | 53 | 0 | 3.918762  | -0.225236 | 0.185120  |
| 9  | 8  | 0 | 1.123938  | -2.038084 | -0.444826 |
| 10 | 1  | 0 | 0.290713  | -2.451376 | -0.160398 |
| 11 | 1  | 0 | 3.495083  | -2.151245 | -1.673752 |
| 12 | 1  | 0 | 4.383475  | -2.851748 | -0.281658 |
| 13 | 1  | 0 | 2.275338  | -2.951165 | 1.046932  |
| 14 | 1  | 0 | 2.129998  | -3.857394 | -0.483520 |

**IN:**

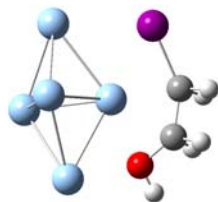

**OUT:**

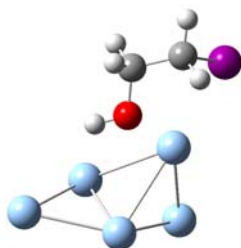

**(B) Cartesian Coordinates for structures shown in Figures 4, 5 and 6. All calculations carried out at the B3LYP/6-31G\* level of theory with the SDD ECP for Ag and I.**

**Ag<sub>5</sub>(I,O,H)<sup>+</sup>**

**Type 1: I and OH on different positions of the Ag<sub>5</sub><sup>+</sup> structure :**

**12a-**

E(B3LYP) = -822.2471369 (0 imag freq), ZPC= 0.015809

|    |           |           |           |
|----|-----------|-----------|-----------|
| Ag | 1.354353  | 0.819893  | 1.405834  |
| Ag | 1.353310  | 0.821298  | -1.405146 |
| Ag | -1.672473 | 1.459959  | 0.000081  |
| Ag | 2.522735  | -1.324314 | -0.000969 |
| Ag | -0.250096 | -1.213364 | 0.000195  |
| I  | -2.990549 | -0.918161 | -0.000062 |
| O  | 0.324484  | 2.357040  | 0.000409  |
| H  | 0.435210  | 3.323003  | 0.000220  |



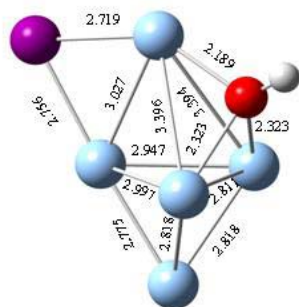**12b-**

E(B3LYP) = -822.2433511 (0 imag. Freq), ZPC= 0.015760

|    |           |           |           |
|----|-----------|-----------|-----------|
| Ag | -3.342932 | -0.529438 | -0.189314 |
| Ag | -0.719677 | -1.259063 | -0.210111 |
| Ag | 0.961878  | 0.493204  | 1.654230  |
| Ag | -1.479367 | 1.414577  | -0.073615 |
| Ag | 2.044079  | 1.142600  | -1.143282 |
| I  | 2.144838  | -1.517945 | -0.072120 |
| O  | 0.597991  | 2.245805  | 0.199261  |
| H  | 0.732521  | 3.176210  | 0.446636  |

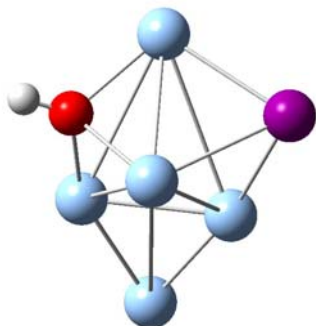**12c-**

E(B3LYP) = -822.2468969 (0 imag. Freq), ZPC= 0.015882

|    |           |          |           |
|----|-----------|----------|-----------|
| Ag | 2.049341  | 1.387105 | 0.000374  |
| Ag | -1.061830 | 1.564759 | -0.082955 |

|    |           |           |           |
|----|-----------|-----------|-----------|
| Ag | 0.192984  | -1.024585 | -0.027850 |
| Ag | -2.332769 | -0.625628 | -1.308471 |
| Ag | -2.243044 | -0.523467 | 1.404989  |
| I  | 2.914622  | -1.199989 | 0.003228  |
| O  | 0.560084  | 2.925858  | 0.128997  |
| H  | 0.624256  | 3.617954  | -0.549186 |

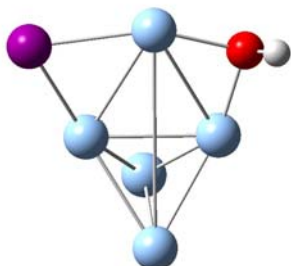**12d-**

E(B3LYP) = -822.2448656 (0 imag. Freq) ZPC: 0.015755

|    |           |           |           |
|----|-----------|-----------|-----------|
| Ag | 1.727522  | 1.501857  | -0.005856 |
| Ag | -1.350869 | 1.553713  | -0.042163 |
| Ag | -0.188225 | -0.671559 | 1.391553  |
| Ag | -0.225181 | -0.828720 | -1.360833 |
| Ag | -2.701397 | -0.820768 | 0.038141  |
| I  | 2.388375  | -1.174958 | 0.006722  |
| O  | 0.232220  | 3.005582  | -0.223173 |
| H  | 0.251386  | 3.705478  | 0.449617  |

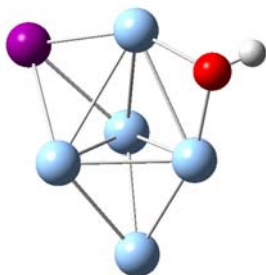**Type 2: Ag<sub>3</sub><sup>+</sup> structure + AgX + AgY:****13a-**

E(B3LYP) = -822.220479 (0 imag. Freq.) ZPC: 0.015079

|    |          |           |          |
|----|----------|-----------|----------|
| Ag | 5.339552 | -1.599523 | 0.017499 |
|----|----------|-----------|----------|

|    |           |           |           |
|----|-----------|-----------|-----------|
| Ag | 1.964935  | 0.497609  | 0.363971  |
| Ag | 0.653114  | 2.766007  | -0.217940 |
| Ag | -0.719636 | 0.450191  | -0.326103 |
| I  | -2.869933 | -1.278462 | -0.861794 |
| O  | 3.661390  | -0.748184 | 0.919466  |
| H  | 3.709686  | -0.869247 | 1.881070  |
| Ag | -4.703801 | -0.526769 | 0.937855  |

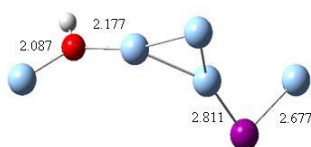**13b-**

E(B3LYP) = -822.2201773 (0 imag. Freq.) ZPC: 0.015007

|    |           |           |           |
|----|-----------|-----------|-----------|
| Ag | -0.602115 | 2.736630  | 0.083724  |
| Ag | 0.733809  | 0.419890  | -0.244004 |
| Ag | -2.040479 | 0.503638  | -0.298796 |
| O  | -3.798262 | -0.743324 | -0.599769 |
| Ag | -5.395871 | -1.522724 | 0.506609  |
| H  | -3.972305 | -0.867648 | -1.546487 |
| I  | 2.822525  | -1.426522 | -0.616066 |
| Ag | 4.852838  | -0.383819 | 0.782172  |

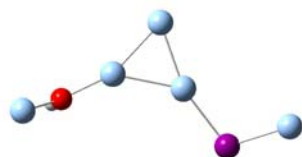**13c-**

E(B3LYP) = -822.237697; 0 imag. Freq.; ZPC: 0.015196

|    |             |             |             |
|----|-------------|-------------|-------------|
| Ag | 0.08875400  | 4.61915300  | 1.33459400  |
| Ag | 0.08875400  | 4.61915300  | -1.33459400 |
| Ag | 0.66399500  | 2.29611600  | 0.00000000  |
| O  | 1.16309200  | 0.22240300  | 0.00000000  |
| Ag | 0.08875400  | -1.58469700 | 0.00000000  |
| I  | -1.45473400 | -3.81403900 | 0.00000000  |
| Ag | 0.46708900  | -5.68828700 | 0.00000000  |
| H  | 2.12094900  | 0.07724800  | 0.00000000  |

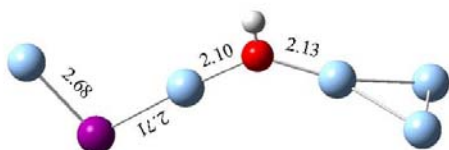

### 13c'-

E(B3LYP) = -822.2378454 (0 imag. Freq.) ZPC: 0.015396

|   |    |   |           |           |           |
|---|----|---|-----------|-----------|-----------|
| 1 | 47 | 0 | 4.537468  | 1.380128  | -0.539220 |
| 2 | 47 | 0 | 4.579871  | -1.251514 | -0.094757 |
| 3 | 47 | 0 | 2.311112  | 0.166693  | 0.499452  |
| 4 | 8  | 0 | 0.303489  | 0.267775  | 1.217893  |
| 5 | 47 | 0 | -1.588580 | -0.284760 | 0.481802  |
| 6 | 47 | 0 | -5.409915 | 1.145275  | -0.016770 |
| 7 | 53 | 0 | -3.979578 | -1.072222 | -0.518101 |
| 8 | 1  | 0 | 0.281843  | 0.361947  | 2.182351  |

### START

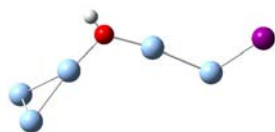

END

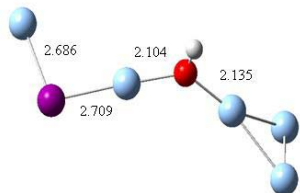**13d-**

E(B3LYP) = - 822.2335119 (0 imag. Freq) ZPC: 0.015450

|    |           |           |           |
|----|-----------|-----------|-----------|
| Ag | 3.876715  | -1.096121 | -1.210812 |
| Ag | 4.052056  | -0.429427 | 1.364215  |
| Ag | 1.854681  | 0.398999  | -0.082361 |
| I  | -0.431268 | 1.900274  | -0.269832 |
| Ag | -2.405277 | 0.122553  | 0.116487  |
| O  | -4.073529 | -1.188548 | 0.373067  |
| Ag | -6.114596 | -0.898587 | 0.029273  |
| H  | -3.942741 | -1.784713 | 1.126857  |

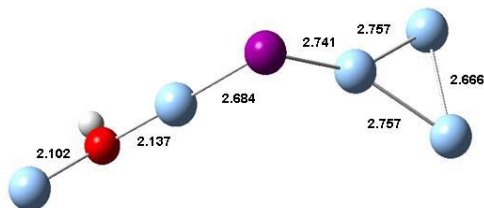**13d'-**

E(B3LYP) = -822.2335102 (0 imag. Freq.) ZPC: 0.015394

|   |    |   |           |           |           |
|---|----|---|-----------|-----------|-----------|
| 1 | 47 | 0 | -4.003997 | -0.496833 | 1.353569  |
| 2 | 47 | 0 | -3.823582 | -1.134459 | -1.228515 |
| 3 | 47 | 0 | -1.839386 | 0.407777  | -0.095276 |
| 4 | 53 | 0 | 0.408364  | 1.962921  | -0.304608 |
| 5 | 47 | 0 | 2.398889  | 0.251635  | 0.253620  |
| 6 | 47 | 0 | 6.030338  | -1.037266 | -0.083614 |
| 7 | 8  | 0 | 4.059644  | -1.033566 | 0.648084  |
| 8 | 1  | 0 | 4.053255  | -1.336422 | 1.569646  |

**START**

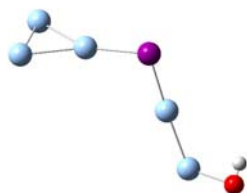

**END**

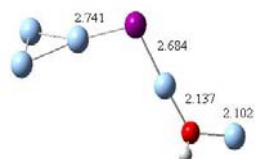

**Type 3: Ag<sub>4</sub>X<sup>+</sup> structure + AgY:**

**14a-**

E(B3LYP) = -822.2250823 (0 imag. Freq) ZPC: 0.015215

|    |           |           |           |
|----|-----------|-----------|-----------|
| Ag | -4.977384 | -0.820716 | 0.000857  |
| Ag | -1.137375 | 0.354727  | -0.000110 |
| Ag | 0.557156  | 2.464534  | -0.000024 |
| Ag | 1.406340  | 0.118731  | -1.388934 |
| Ag | 1.405610  | 0.118801  | 1.389084  |
| I  | 2.917783  | -1.807415 | 0.000386  |
| O  | -2.873710 | -0.929934 | -0.006081 |
| H  | -2.607084 | -1.863177 | -0.012832 |

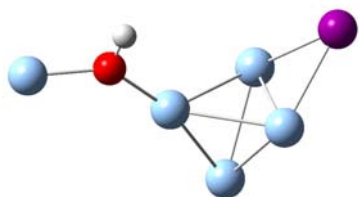**14b-**

E(B3LYP) = -822.2133053 (0 imag. Freq.) ZPC = 0.015025 (Hartree/Particle)

|    |           |           |           |
|----|-----------|-----------|-----------|
| Ag | -2.100636 | -3.341643 | -0.579487 |
| Ag | 0.103945  | 0.409729  | -0.132650 |
| Ag | -0.682943 | 2.997991  | 0.073649  |
| Ag | 1.776054  | 2.502921  | -1.306920 |
| Ag | 1.652514  | 2.237949  | 1.545156  |
| O  | 3.289289  | 2.863594  | 0.232888  |
| I  | 0.390656  | -2.354161 | -0.376509 |
| H  | 4.122023  | 2.363933  | 0.222721  |

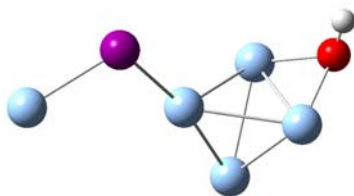

**Type 4: Ag<sub>5</sub><sup>+</sup> structure + hypiodous acid (IOH):**

**15a-**

E(B3LYP) = -822.1536828 (0 imag. Freq.) ZPC = 0.015269 (Hartree/Particle)

|    |           |           |           |
|----|-----------|-----------|-----------|
| Ag | -3.633121 | 0.215439  | 1.301384  |
| Ag | -3.617699 | -0.389172 | -1.277573 |
| Ag | -1.149492 | 0.015257  | 0.003511  |
| Ag | 1.205014  | 1.445973  | -0.277016 |
| Ag | 1.363915  | -1.180968 | 0.233523  |
| I  | 4.550933  | -0.353338 | 0.061754  |
| O  | 3.589116  | 1.446219  | -0.319551 |
| H  | 4.162583  | 2.150401  | 0.043524  |

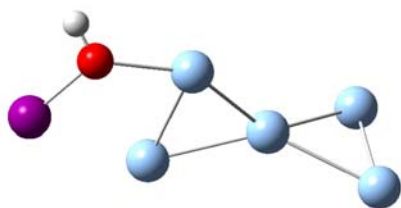**15b-**

E(B3LYP) = -822.1610929 (0 imag. Freq.) ZPC = 0.015660 (Hartree/Particle)

|    |           |           |           |
|----|-----------|-----------|-----------|
| Ag | 2.967738  | -1.462506 | -1.242124 |
| Ag | 3.476838  | -0.722833 | 1.253135  |
| Ag | 1.242143  | 0.377454  | -0.025955 |
| Ag | -0.075922 | 2.757687  | -0.422086 |
| Ag | -1.518297 | 0.654416  | 0.342554  |
| I  | -4.843094 | -1.325708 | -0.108939 |
| O  | -3.287148 | -0.584508 | 1.046617  |
| H  | -3.672180 | -0.355006 | 1.912745  |

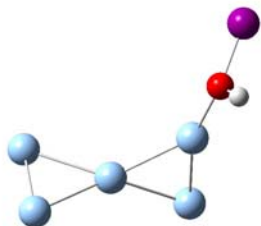**15c-**

E(B3LYP) = -822.1521615 (0 imag. Freq) ZPC: 0.015359



|    |           |           |           |
|----|-----------|-----------|-----------|
| Ag | 3.324804  | -0.733400 | -1.276351 |
| Ag | 3.105825  | -0.989182 | 1.353518  |
| Ag | 1.097199  | 0.404637  | -0.015536 |
| Ag | -0.418666 | 2.686267  | 0.058641  |
| Ag | -1.708984 | 0.351457  | -0.082387 |
| I  | -3.922373 | -1.486225 | -0.195241 |
| O  | -5.031519 | -0.278325 | 1.017666  |
| H  | -5.670444 | 0.166933  | 0.425881  |

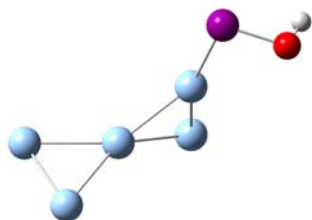**15d-**

E(B3LYP) = -822.1522958 (0 imag. Freq.) ZPC: 0.015284

|    |           |           |           |
|----|-----------|-----------|-----------|
| O  | -3.223143 | -2.543003 | -1.090004 |
| Ag | 1.057383  | 0.467299  | -0.044670 |
| I  | -3.955985 | -1.271977 | 0.328499  |
| Ag | 2.953324  | -1.215266 | -1.233092 |
| Ag | 3.185009  | -0.694173 | 1.357847  |
| Ag | -1.751158 | 0.549241  | -0.000501 |
| H  | -3.791376 | -2.407975 | -1.874219 |
| Ag | -0.354267 | 2.811341  | -0.224609 |

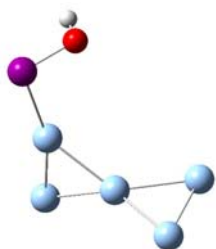**15e- (The initial input guess for this structure was from adduct 9d less C<sub>2</sub>H<sub>4</sub>)**

E(B3LYP) = -822.1581668 (0 imag. Freq.) ZPC= 0.015369

|    |             |             |             |
|----|-------------|-------------|-------------|
| Ag | 0.07585300  | -0.24516600 | -0.00217800 |
| Ag | -2.25265200 | 1.42813700  | 0.01865000  |
| Ag | 0.22405500  | 2.53148000  | -0.05051100 |

|    |             |             |             |
|----|-------------|-------------|-------------|
| Ag | 2.27779900  | -1.95994100 | -0.02050500 |
| Ag | 2.60310600  | 0.75049000  | 0.05323200  |
| I  | -1.99387000 | -2.11776700 | -0.01433100 |
| O  | -3.47837600 | -0.58535400 | 0.01301000  |
| H  | -4.12143900 | -0.81055700 | 0.71711800  |

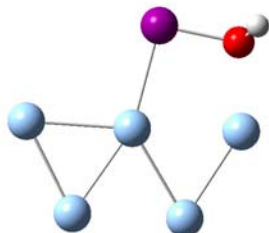

**15f-** (The initial input guess for this structure was from adducts 9c and 9h less C<sub>2</sub>H<sub>4</sub>)  
 E(B3LYP) = -822.1630131 (0 imag. Freq.) ZPC = 0.015674

|    |             |             |             |
|----|-------------|-------------|-------------|
| Ag | -0.58865900 | -1.88246400 | 0.07973000  |
| Ag | -1.38892100 | 0.78737100  | 0.00264200  |
| Ag | 1.36998000  | 1.06802500  | -0.00447500 |
| Ag | -3.19281800 | -1.34708400 | -0.07319500 |
| Ag | -0.14664100 | 3.26315500  | 0.02733600  |
| I  | 3.21737500  | -1.22914700 | -0.07033800 |
| O  | 1.63710300  | -2.55826600 | 0.16723000  |
| H  | 1.89407900  | -3.17222400 | 0.88430300  |

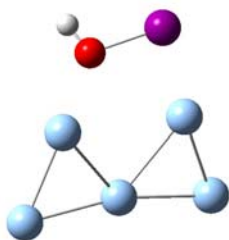

**Ag<sub>4</sub>I<sup>+</sup>**

**16a-**

E(B3LYP) = -599.334828 (2 imag. Freq. (-6.7 and -6.8)) ZPC = 0.001926

|    |          |          |           |
|----|----------|----------|-----------|
| I  | 0.000000 | 0.000000 | 3.356867  |
| Ag | 0.000000 | 0.000000 | 0.770932  |
| Ag | 0.000000 | 1.618907 | -1.518778 |

Ag 1.402015 -0.809454 -1.518778  
 Ag -1.402015 -0.809454 -1.518778

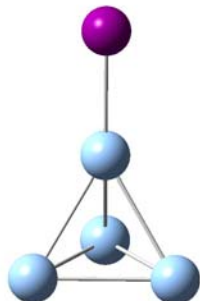**16b-**

E(B3LYP)=-599.3568604, (0 imag. Freq.) ZPC = 0.001903

Ag 0.320655 1.403943 -0.040603  
 Ag -1.853877 0.038977 1.347903  
 Ag -1.861103 -0.039149 -1.342504  
 Ag 0.317379 -1.401592 0.034311  
 I 2.728612 -0.001932 0.000792

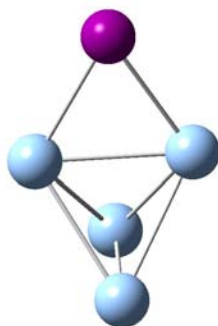**16c-**

E(B3LYP)=-599.3556366, (0 imag. Freq.) ZPC = 0.001911

Ag -0.090269 1.645170 0.000000  
 Ag -2.399799 -0.001779 0.000000  
 Ag -0.090269 -0.822396 1.424832  
 Ag -0.090269 -0.822396 -1.424832  
 I 2.368273 0.001242 0.000000

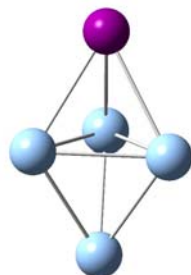**17a-**

E(B3LYP) = -599.3621601, (0 imag. Freq.) ZPC = 0.001790

|    |           |           |           |
|----|-----------|-----------|-----------|
| Ag | -2.809096 | 1.367646  | -0.069729 |
| Ag | -2.836624 | -1.285517 | -0.400182 |
| Ag | -0.472120 | -0.046804 | 0.277545  |
| I  | 2.169429  | -0.178840 | 1.125452  |
| Ag | 3.671463  | 0.166346  | -1.076760 |

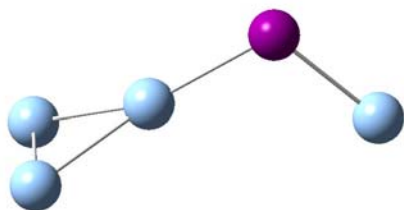**Ag<sub>4</sub>OH<sup>+</sup>****18a-**

E(B3LYP) = -663.6686064, (1 imag. Freq. (- 68.6)) ZPC = 0.013389

|    |           |           |           |
|----|-----------|-----------|-----------|
| Ag | -1.525745 | -0.002766 | 0.096333  |
| Ag | 0.644915  | 1.439208  | -0.825943 |
| Ag | 0.647750  | -1.414508 | -0.861902 |
| Ag | 0.915991  | -0.016223 | 1.530225  |
| O  | -3.494577 | -0.018398 | 0.358496  |
| H  | -4.007611 | -0.009357 | -0.467714 |

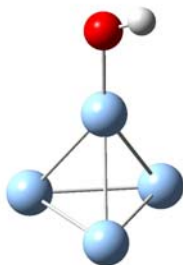**18b-**

E(B3LYP)=-663.6960219, (0 imag. Freq.) ZPC = 0.014104

|    |           |           |           |
|----|-----------|-----------|-----------|
| Ag | 0.932044  | -1.486346 | -0.074395 |
| Ag | -1.240573 | -0.000241 | -1.292113 |
| Ag | -1.115477 | 0.000211  | 1.400147  |
| Ag | 0.931965  | 1.486360  | -0.074805 |
| O  | 2.476874  | 0.000090  | 0.270292  |
| H  | 3.310950  | 0.000042  | -0.227524 |

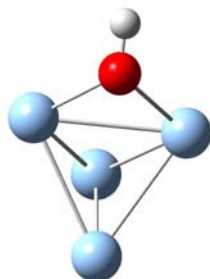**18c-**

E(B3LYP)=-663.7019323, (0 imag. Freq.) ZPC = 0.014195

|    |           |           |           |
|----|-----------|-----------|-----------|
| Ag | 1.777097  | 0.185392  | 0.000000  |
| Ag | -0.639483 | 1.661861  | 0.000000  |
| Ag | -0.639483 | -0.738535 | 1.497498  |
| Ag | -0.639483 | -0.738535 | -1.497498 |
| O  | 0.699144  | -1.832023 | 0.000000  |
| H  | 1.050359  | -2.742384 | 0.000000  |

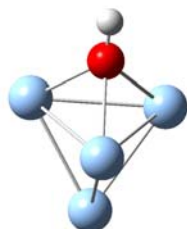**19a-**

E(B3LYP) = -663.7111376, (0 imag. Freq.) ZPC = 0.014250

|    |           |           |           |
|----|-----------|-----------|-----------|
| Ag | -2.216405 | 1.372458  | -0.099586 |
| Ag | -2.322347 | -1.300538 | -0.145632 |
| Ag | 0.078800  | -0.065257 | 0.316246  |
| O  | 2.193081  | -0.145333 | 0.751155  |
| Ag | 4.036756  | 0.022839  | -0.235192 |
| H  | 2.345559  | -0.223962 | 1.706462  |

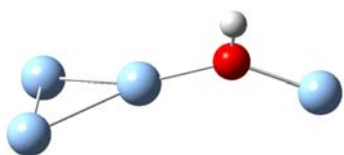**(C) Cartesian coordinates for other structures used in thermochemical calculations****Ag<sub>2</sub>(I,OH)****20a-**

E(B3LYP) = -381.334069, (0 imag. Freq.) ZPC = 0.013801

|    |             |             |             |
|----|-------------|-------------|-------------|
| Ag | -0.73553997 | -1.43393898 | 0.00440200  |
| Ag | -0.73259199 | 1.43463099  | 0.00440200  |
| O  | -2.41957092 | 0.00299200  | -0.12446300 |
| I  | 1.72359896  | -0.00114300 | -0.00145800 |
| H  | -2.99200511 | 0.00415600  | 0.65916902  |

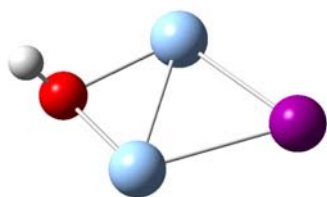**20b-**

$E(\text{B3LYP}) = -381.3240814$ , (0 imag. Freq.) ZPC = 0.014264

|    |             |             |             |
|----|-------------|-------------|-------------|
| I  | 1.06759596  | 2.00652909  | -0.33129799 |
| Ag | -2.49902010 | -0.13926500 | 0.12458700  |
| O  | -3.99553609 | -1.69439304 | 0.36558101  |
| Ag | -5.34554291 | -0.09815100 | -0.09125500 |
| H  | -4.05971479 | -1.92374003 | 1.30823696  |

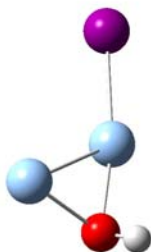**CH<sub>2</sub>CH<sub>2</sub>**

$E(\text{B3LYP}) = -78.585824$ ; (0 imag. Freq.) ZPC = 0.051256

|   |           |           |           |
|---|-----------|-----------|-----------|
| C | -0.665608 | 0.000001  | -0.000068 |
| C | 0.665608  | -0.000003 | -0.000093 |
| H | -1.239365 | 0.923289  | 0.000015  |
| H | -1.239371 | -0.923284 | 0.000429  |
| H | 1.239366  | -0.923290 | 0.000055  |
| H | 1.239370  | 0.923299  | 0.000470  |

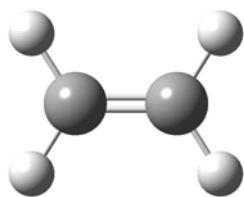

**(B) Supplementary table S1; lists DFT energies, relative energies and reaction thermodynamics.**



**Table S1:** DFT calculated energies for ground state structures relevant to the formation of adducts of  $\text{Ag}_5^+$  and  $\text{ICH}_2\text{CH}_2\text{OH}$ . The scaling factor used is 0.9806 and the basis sets were SDD for Ag and I, and 6-31G\* for C,O and H.

| calculations on $\text{Ag}_5^+$ + $\text{ICH}_2\text{CH}_2\text{OH}$        | B3LYP/6-31G*<br>(SDD ecp on Ag<br>and I) | ZPE      | ZPE scaled  | E(B3LYP) corrected | Rel. energy<br>kcal/mol | Figure# |
|-----------------------------------------------------------------------------|------------------------------------------|----------|-------------|--------------------|-------------------------|---------|
| Ag5+, 1                                                                     | -734.940793                              | 0.001823 | 0.001787634 | -734.9390054       | 0                       | 2       |
| Ag5+, 2                                                                     | -734.914545                              | 0.001731 | 0.001697418 | -734.9128476       | 16.41428                | 2       |
| ICH2CH2OH, 3                                                                | -165.84297                               | 0.07061  | 0.069240166 | -165.7737298       |                         | 2       |
| <b>monodentate adducts (input on bitrigonal orthogonal structure (BOS))</b> |                                          |          |             |                    |                         |         |
| structure 8a, initial adduct on BOS                                         | -900.816777                              | 0.073161 | 0.071741677 | -900.7450353       | 9.920891935             |         |
| structure 8b, initial adduct on BOS                                         | -900.82169                               | 0.073559 | 0.072131955 | -900.749558        | 7.082839155             |         |
| structure 9a, initial adduct on BOS                                         | -900.826584                              | 0.073927 | 0.072492816 | -900.7540912       | 4.238248976             | 3(a)    |
| structure 8c, initial adduct on BOS(unconv)                                 | -900.82228                               | 0.074237 | 0.072796802 | -900.7494832       | 7.129806271             |         |
| <b>monodentate adducts (input on trigonal bipyramidal structure (TBS))</b>  |                                          |          |             |                    |                         |         |
| structure 8d, initial adduct on TBS                                         | -900.814274                              | 0.073292 | 0.071870135 | -900.7424039       | 11.57215852             |         |
| structure 9h, initial adduct on TBS                                         | -900.830338                              | 0.074298 | 0.072856619 | -900.7574814       | 2.110866205             | 3(d)    |
| structure 8e, initial adduct on TBS                                         | -900.814164                              | 0.073324 | 0.071901514 | -900.7422625       | 11.66087538             |         |
| structure 8f and 8g, initial adduct on TBS                                  | -900.817412                              | 0.073868 | 0.072434961 | -900.744977        | 9.957465854             |         |
| structure 11a, initial adduct on TBS                                        | -900.797219                              | 0.073845 | 0.072412407 | -900.7248066       | 22.61462255             | 3(b)    |
| <b>Bidentate structures</b>                                                 |                                          |          |             |                    |                         |         |
| structure 9b, initial adduct on BOS                                         | -900.828338                              | 0.07387  | 0.072436922 | -900.7559011       | 3.102522266             |         |
| structure 9a, initial adduct on BOS                                         | -900.826581                              | 0.073931 | 0.072496739 | -900.7540843       | 4.242592851             |         |
| structure 9d, initial adduct on BOS                                         | -900.824483                              | 0.073772 | 0.072340823 | -900.7521422       | 5.461270358             | 3(e)    |
| structure 9b', initial adduct on TBS                                        | -900.828346                              | 0.073875 | 0.072441825 | -900.7559042       | 3.100578868             |         |
| structure 10a, initial adduct on TBS                                        | -900.81772                               | 0.074003 | 0.072567342 | -900.7451527       | 9.847263175             | 3(f)    |
| structure 9c, initial adduct on TBS                                         | -900.833544                              | 0.074137 | 0.072698742 | -900.7608453       | 0                       | 3(c)    |
| structure 9e, initial adduct on TBS                                         | -900.832594                              | 0.074046 | 0.072609508 | -900.7599845       | 0.540138896             |         |
| structure 9f, initial adduct on TBS                                         | -900.831432                              | 0.074026 | 0.072589896 | -900.7588421       | 1.25699879              |         |
| structure 10b, initial adduct on TBS                                        | -900.816127                              | 0.073934 | 0.07249968  | -900.7436273       | 10.8044284              |         |
| structure 9g, initial adduct on TBS                                         | -900.832556                              | 0.074084 | 0.07264677  | -900.7599092       | 0.587367056             |         |

**Table S2:** DFT calculated energies for ground state structures relevant to the structures used in the thermochemistry calculations. The scaling factor used is 0.9806 and the basis sets were SDD for Ag and I, and 6-31G\* for C,O and H.

|                   | B3LYP/6-31G* (SDD<br>ECP on Ag and I) | ZPE (Scaled) | E(B3LYP)+ZPE | Rel. energy<br>kcal/mol | Figure#                              |  |                      |
|-------------------|---------------------------------------|--------------|--------------|-------------------------|--------------------------------------|--|----------------------|
| Ag5+ 1            | -734.940753                           | 0.001788     | -734.938965  | 0                       |                                      |  |                      |
| Ag5+ 2            | -734.914545                           | 0.001697418  | -734.9128476 | 16.41428                |                                      |  |                      |
| ICH2CH2OH, 5      | -165.84297                            | 0.06924      | -165.77373   |                         |                                      |  |                      |
| C2H4              | -78.585824                            | 0.050262     | -78.535562   |                         |                                      |  |                      |
| AgOH, 7           | -222.79785                            | 0.011275     | -222.786575  |                         |                                      |  |                      |
| AgI, 6            | -158.47328                            | 0.000428     | -158.472852  |                         |                                      |  |                      |
|                   |                                       |              |              |                         |                                      |  |                      |
|                   |                                       |              |              |                         |                                      |  | DH eq. 14 in<br>kcal |
| Ag5(I,O,H)+ , 12a | -822.247137                           | 0.015502     | -822.231635  | 0                       |                                      |  | -34.20055            |
| Ag5(I,O,H)+ , 12b | -822.243351                           | 0.015454     | -822.227897  | 2.34500487              |                                      |  | -31.854917           |
| Ag5(I,O,H)+ , 12c | -822.246897                           | 0.015574     | -822.231323  | 0.19641063              |                                      |  | -34.0047669          |
| Ag5(I,O,H)+ , 12d | -822.244866                           | 0.015449     | -822.229417  | 1.39118967              |                                      |  | -32.80873            |
| Ag5(I,O,H)+ , 13d | -822.233512                           | 0.01515      | -822.218362  | 8.32454766              |                                      |  | -25.87161            |
| Ag5(I,O,H)+ , 13c | -822.237697                           | 0.014901     | -822.222796  | 5.53903077              |                                      |  | -28.65399            |
| Ag5(I,O,H)+ , 13a | -822.220479                           | 0.014786     | -822.205693  | 16.278864               |                                      |  | -17.92168            |
| Ag5(I,O,H)+ , 13b | -822.220177                           | 0.0147159    | -822.207054  | 15.42474                |                                      |  | -18.77573            |
| Ag5(I,O,H)+ , 14a | -822.225082                           | 0.01492      | -822.210162  | 13.46699211             |                                      |  | -20.726028           |
| Ag5(I,O,H)+ , 14b | -822.213305                           | 0.014734     | -822.198571  | 20.73795048             |                                      |  | -13.452559           |
| Ag5(I,O,H)+ , 15a | -822.153683                           | 0.014973     | -822.13871   | 58.30446414             | removing<br>CH2=CH2 from<br>adduct#2 |  | 24.110817            |
| Ag5(I,O,H)+ , 15b | -822.161093                           | 0.015356     | -822.145737  | 53.89997145             | removing<br>CH2=CH2 from<br>adduct#3 |  | 19.701304            |
| Ag5(I,O,H)+ , 15c | -822.152162                           | 0.015061     | -822.137101  | 59.31538275             |                                      |  | 25.12048             |
| Ag5(I,O,H)+ , 15d | -822.152296                           | 0.014988     | -822.137308  | 59.18486067             |                                      |  | 24.990586            |
| Ag5(I,O,H)+ , 15e | -822.158167                           | 0.015071     | -822.173238  | 36.6447                 |                                      |  | 2.444151             |
| Ag5(I,O,H)+ 15f   | -822.163012                           | 0.015386     | -822.147626  | 52.71648                |                                      |  | 18.515938            |

|                               |                         |                |                    |             |           |                            |
|-------------------------------|-------------------------|----------------|--------------------|-------------|-----------|----------------------------|
|                               |                         |                |                    |             |           |                            |
| Ag4I+ ,16a                    | -599.3348297            | 0.001877       | -599.3329527       | 17.22791054 |           | 2 imag freq: -6.7,<br>-6.8 |
| Ag4I+ ,16b                    | -599.3568604            | 0.001866       | -599.3549944       | 3.396523377 | Figure 5a |                            |
| Ag4I+ ,16c                    | -599.3556366            | 0.001874       | -599.3537626       | 4.169490195 | Figure 5b |                            |
| Ag4I+ , 17                    | -599.3621601            | 0.001755       | -599.3604051       | 0           | Figure 5c |                            |
|                               |                         |                |                    |             |           |                            |
| Ag4OH+ , 18a                  | -663.6686064            | 0.013129       | -663.6554774       | 26.1484672  |           | 1 imag freq.: -<br>68.6    |
| Ag4OH+ , 18b                  | -663.6960219            | 0.01383        | -663.6821919       | 9.393636447 | Figure 6a |                            |
| Ag4OH+ ,18c                   | -663.7019323            | 0.01392        | -663.6880123       | 5.741904753 | Figure 6b |                            |
| Ag4OH+ , 19                   | -663.7111376            | 0.013974       | -663.6971636       | 0           | Figure 6c |                            |
|                               |                         |                |                    |             |           |                            |
| Ag2,I,OH neutral , 20a        | -381.334069             | 0.013533       | -381.320536        | 0           |           |                            |
| Ag2,I,OH neutral , 20b        | -381.3240814            | 0.013987       | -381.3100944       | 6.557856006 |           |                            |
|                               |                         |                |                    |             |           |                            |
| Ag3+ , 3                      | -440.842526             | 0.000879       | -440.841647        |             |           |                            |
|                               |                         |                |                    |             |           |                            |
|                               |                         |                |                    |             |           |                            |
| <b>Competing pathways for</b> | <b>Eqs. 19 a -f</b>     | DHr (Hartrees) | DHr (kcal.mol-1)   |             |           |                            |
|                               |                         |                |                    |             |           |                            |
| CID of Ag5HIO+ -->            | Ag4I+ + AgOH (19a)      | 0.0846059      | 53.09104831        |             |           |                            |
|                               | Ag4OH+ + AgI (19b)      | 0.0615964      | <b>38.65235696</b> |             |           |                            |
|                               | Ag3+ + AgI + AgOH (19d) | 0.130502       | 81.89131002        |             |           |                            |
|                               | Ag3+ + [Ag2,I,OH] (19c) | 0.06943        | <b>43.5680193</b>  |             |           |                            |
|                               | Ag2I+ + Ag3OH (19e)     | 0.10024        | 62.901602          |             |           |                            |
|                               | Ag2OH+ + Ag3I (19f)     | 0.08903        | 55.867215          |             |           |                            |
|                               |                         |                |                    |             |           |                            |
|                               |                         |                |                    |             |           |                            |
| <b>Other reactions</b>        |                         |                |                    |             |           |                            |
|                               |                         |                |                    |             |           |                            |
| Ag5+ (1) + ICH2CH2OH -->      | Ag5ICH2CH2OH + (9c)     | -0.0481503     | -30.21479475       |             |           |                            |
|                               |                         |                |                    |             |           |                            |
| Ag5+ (1) + ICH2CH2OH -->      | Ag5ICH2CH2OH + (11a)    | -0.0324577     | -20.36753133       |             |           |                            |
|                               |                         |                |                    |             |           |                            |
| Ag5+ (2) + ICH2CH2OH -->      | Ag5ICH2CH2OH + (11a)    | -0.0585697     | -36.75307245       |             |           |                            |

**Table S3:** Assignments of the peaks observed in Figs. 7a and 7b for the reactions of  $\text{Ag}_6\text{H}^+$  with  $\text{ICH}_2\text{CH}_2\text{OH}$  (L). These assignments were also compared to single isotope experiments. A \* denotes a weak peak, assignment is tentative.

| $m/z$ | Assignment                                       |
|-------|--------------------------------------------------|
| 323   | $\text{Ag}_3^+$                                  |
| 649   | $\text{Ag}_6\text{H}^+$                          |
| 775   | $\text{Ag}_6\text{I}^+$                          |
| 793   | $\text{Ag}_6\text{I}^+ \cdot \text{H}_2\text{O}$ |
| 821   | $\text{Ag}_6\text{H}^+ \cdot \text{L}$           |
| 902   | $\text{Ag}_6\text{I}_2^+$                        |
| 919   | $[\text{Ag}_6\text{I, I, OH}]^+$                 |
| 947   | $\text{Ag}_6\text{I}^+ \cdot \text{L}$           |
| 993*  | $\text{Ag}_6\text{H}^+ \cdot 2\text{L}$          |
| 1029  | $\text{Ag}_6\text{I}_3^+$                        |
| 1074  | $\text{Ag}_6\text{I}_2^+ \cdot \text{L}$         |
| 1119  | $\text{Ag}_6\text{I}^+ \cdot 2\text{L}$          |
| 1201  | $\text{Ag}_6\text{I}_3^+ \cdot \text{L}$         |
| 1246* | $\text{Ag}_6\text{I}_2^+ \cdot 2\text{L}$        |
